# 1 Generation and characterization of CRISPR-Cas9-Mediated 2 XPC Gene Knockout in Human Skin Cells

3  
4 Ali Nasrallah<sup>a</sup>, Hamid-Reza Rezvani<sup>b,c</sup>, Farah Kobaisi<sup>a</sup>, Ahmad Hammoud<sup>a</sup>, Jérôme Rambert<sup>b,c</sup>,  
5 Jos P.H. Smits<sup>d</sup>, Eric Sulpice<sup>a</sup>, Walid Rachidi<sup>a\*</sup>

6  
7 <sup>a</sup> Univ. Grenoble Alpes, CEA, Inserm, IRIG, UA13 BGE, Biomics, 38000 Grenoble

8 <sup>b</sup> Department of Dermatology, Radboud University Medical Center (Radboudumc), Nijmegen,  
9 The Netherlands.

10 <sup>c</sup> Univ. Bordeaux, INSERM, BRIC, UMR1312, Bordeaux Institute of Oncology, Bordeaux, France

11 <sup>d</sup> Department of Dermatology, Radboud Institute for Molecular Life Sciences, Radboud University

12 \*Corresponding Authors:

13 Walid Rachidi, [walid.rachidi@univ-grenoble-alpes.fr](mailto:walid.rachidi@univ-grenoble-alpes.fr)

14  
15  
16  
17  
18  
19  
20  
21  
22  
23  
24  
25  
26  
27  
28  
29  
30  
31  
32  
33  
34  
35  
36  
37  
38  
39  
40  
41  
42

## 43 Abstract

44 Xeroderma pigmentosum group C (XPC) is a versatile protein, crucial for sensing DNA damage  
45 in the global genome nucleotide excision repair (GG-NER) pathway. This pathway is vital for  
46 mammalian cells, acting as their essential approach for repairing DNA lesions stemming from  
47 interactions with environmental factors, such as exposure to ultraviolet (UV) radiation from the  
48 sun. Loss-of-function mutations in the *XPC* gene confer a photosensitive phenotype in XP-C  
49 patients with the accumulation of unrepaired UV induced DNA damage. This remarkable increase  
50 in DNA damage tends to elevate by 10,000-fold the risk of developing melanoma and non-  
51 melanoma skin cancers. To date, creating accurate and reproducible models to study human XP-  
52 C disease has been an important challenge. To tackle this, we used CRISPR-Cas9 technology in  
53 order to knockout *XPC* gene in various human skin cells (keratinocytes, fibroblasts, and  
54 melanocytes). After validation of the *XPC* knockout in these edited skin cells, we showed that they  
55 recapitulate the major phenotypes of XPC mutations: photosensitivity and the impairment of UV  
56 induced DNA damage repair. Moreover, these mutated cells demonstrated a reduced proliferative  
57 capacity compared to their respective wild-type controls. Finally, to better mimic the disease  
58 environment, we built a 3D reconstructed skin using these XPC knockout skin cells. This model  
59 exhibited an abnormal behavior, showing an extensive remodeling of its extracellular matrix  
60 compared to normal skin. Analyzing the composition of the fibroblasts secretome revealed a  
61 significant augmented shift in the inflammatory response following XPC knockout. Our innovative  
62 “disease on a dish” approach can provide valuable insights into the molecular mechanisms  
63 underlying XP-C disease, paving the way to design novel preventive and therapeutic strategies to  
64 alleviate the disease phenotype. Also, given the high risk of skin cancer onset in XP-C disease, our  
65 new approach can also serve as a link to draw novel insights towards this elusive field.

66  
67 Keywords: skin, CRISPR-Cas9, XP-C disease, DNA damage, UV irradiation  
68

## 69 Introduction

70  
71 The skin, making up about 15% to 20% of an adult's body weight and covering a surface area  
72 ranging from 1.5 to 2 m<sup>2</sup>, stands out as the largest organ in the human body. It fulfills numerous  
73 crucial roles, including vitamin D and melanin synthesis, sensory perception, hydration prevention,  
74 temperature regulation, acting as a primary barrier against external pathogens, and providing  
75 protection against mechanical stress<sup>1</sup>. Nevertheless, skin cells remain prone to metabolic  
76 disruptions because they are directly exposed to external factors. Among them, ultraviolet  
77 radiation (UVR) stands out for its potent genotoxic effects, leading to DNA damage and potentially  
78 tumor development. According to its wavelength, UVR from the sunlight can be divided into three  
79 types: UVA ( $\lambda=320\text{--}400$  nm), UVB ( $\lambda=280\text{--}320$  nm), and UVC ( $\lambda=100\text{--}280$  nm). UVC, being  
80 absorbed by the ozone layer, leaves UVA and UVB as the main sources of UV-induced DNA  
81 lesions<sup>2</sup>. DNA can directly absorb UVB irradiation with wavelengths between 280 and 320nm to  
82 yield dimers between adjacent pyrimidine residues. These lesions can manifest either as dewar  
83 isomers, cyclobutane pyrimidine dimers (CPDs), or 6-4 pyrimidine-pyrimidone photoproducts (6-  
84 4PPs) depending on the amount of energy absorbed by the DNA chain's base pairs<sup>3</sup>. Among these,  
85 6-4PPs induce a pronounced helical distortion in the DNA, making them readily detectable and

86 subject to faster repair kinetics compared to CPDs<sup>4</sup>. CPDs, on the other hand, typically cause a  
87 weaker helical distortion in the DNA, rendering them more challenging to repair<sup>4</sup>. The ongoing  
88 presence of these dimers can ultimately result in the creation of double-strand breaks, as a result  
89 of replication forks collapsing. UVB irradiation predominantly leads to CC→TT or C→T  
90 transitions in DNA, and these mutations are classified as a signature for such type of irradiation<sup>5</sup>.  
91 Additionally, exposure to UVB radiation can generate reactive oxygen species (ROS), though at  
92 diminished levels compared to UVA irradiation, necessitating prompt repair intervention<sup>6</sup>.

93  
94 DNA repair systems have developed throughout biological evolution to address various types of  
95 DNA damage with specificity. Upon detecting a lesion, repair systems initiate a cascade of events  
96 involving damage sensing, verification, error correction, and restoration of the initial genetic  
97 information. There are several DNA repair pathways, including nucleotide excision repair (NER),  
98 base excision repair (BER), mismatch-mediated repair (MMR), double-stranded break (DSB)  
99 repair, and others. Among these, the nucleotide excision repair (NER) pathway plays a pivotal role  
100 in removing photoproducts induced by UV light. NER process is intricate and involves a  
101 consortium of more than 40 proteins working sequentially to remove DNA damage. This DNA  
102 repair pathway can be subdivided into two main mechanisms: transcription-coupled repair (TCR)  
103 and global genome repair (GGR). TCR primarily operates in regions of actively transcribed genes,  
104 while GGR is responsible for repairing DNA damage throughout the entire genome, including  
105 both transcribed and non-transcribed DNA strands in active and dormant genes. TCR and GGR  
106 involve different recognition mechanisms for DNA damage. In GGR, a complex composed of  
107 XPC-Rad23B-Centrin2 and XPE-DDB1 is required for damage identification. XPC is adept at  
108 sensing 6-4PP lesions, while CPDs require the involvement of XPE-DDB1. TCR recognition, on  
109 the other hand, relies on CSA and CSB proteins. The subsequent repair procedures are identical  
110 for both GGR and TCR. This involves enlisting the XPD and XPB helicase components from the  
111 TFIIH complex to uncoil the DNA in the vicinity of the damaged site. Once XPA has confirmed  
112 the damage, the nucleases XPF and XPG remove the damaged displaced strand, resulting in a gap  
113 that is filled and sealed by the DNA polymerase and ligase machinery<sup>7</sup>.

114  
115 Deficiencies in NER are linked to various disorders, including Xeroderma pigmentosum (XP),  
116 Cockayne syndrome (CS), Trichothiodystrophy (TTD), Cerebro-oculo-facio-skeletal syndrome  
117 (COFS), UV-sensitive syndrome (UVsS), and combined phenotypes, e.g. XP-CS, XP-TTD.  
118 Xeroderma Pigmentosum (XP) arising from GG-NER deficiency and can be defined as a  
119 hereditary autosomal recessive genetic disease characterized by abnormal pigmentation and an  
120 extremely hypersensitive phenotype to sunlight. XP encompasses a variable nomenclature based  
121 on the type of mutation affecting one of eight different XP genes (XPA to XPG and XPV). As a  
122 result, there is a high predisposition for cutaneous cancer onset on body parts exposed to sunlight<sup>8</sup>.  
123 Furthermore, internal cancers also can develop (lung, glioma, leukemia, prostate, uterus, or  
124 breast)<sup>9</sup>. Being the most commonly affected genetic variant in XP genodermatosis, XP-C disease,  
125 also known as Xeroderma Pigmentosum complementation group C (OMIM# 278,720), results  
126 mainly from nonsense mutations in the XPC protein, being crucial for initiating the GG-NER  
127 pathway by detecting and binding to DNA helical distortions opposite to the photoproducts  
128 generated by UV radiation<sup>10</sup>. Individuals with XP-C disease experience extreme photosensitivity  
129 and an accumulation of UV-induced DNA damage due to these genetic mutations. This condition  
130 is often referred to as a skin cancer-prone disease because individuals with XP-C have a  
131 significantly higher risk of developing melanomas and non-melanoma skin cancers (NMSCs) at a

132 young age compared to healthy individuals. In fact, their susceptibility to these skin cancers is  
133 estimated to be 2,000 to 10,000 times greater than that of normal individuals<sup>11</sup>. This high fold risk  
134 underscores the critical role of the DNA damage recognition protein in protecting against the  
135 harmful effects of UV radiation. It's important to note that, at present, there is no cure for XP-C  
136 syndrome. The primary approach to managing this condition involves preventive measures, such  
137 as the use of specialized UV protective shields, antioxidant creams, and sunscreens<sup>12</sup>. In addition  
138 to its role in Nucleotide Excision Repair (NER), XPC plays a pivotal role in various other cellular  
139 processes and DNA repair pathways. For instance, XPC is actively involved in the initial step of  
140 Base Excision Repair (BER), particularly in the removal of oxidative DNA damage<sup>13</sup>.  
141 Additionally, XPC plays a crucial role in maintaining the balance of cellular redox levels. Rezvani  
142 and colleagues illustrated that when XPC is deficient, it leads to the buildup of DNA damage,  
143 which, in turn, initiates the activation of AKT1. AKT1 is a well-known factor that triggers the  
144 activation of NADPH oxidase 1 (NOX1), an enzyme responsible for producing reactive oxygen  
145 species (ROS)<sup>14</sup>. Furthermore, Liu and their team have demonstrated the significance of XPC in  
146 apoptotic processes using zebrafish model<sup>15</sup>, and Magnaldo and his associates have highlighted  
147 XPC's involvement in disturbing skin differentiation<sup>16</sup>.

148  
149 Although some aspects regarding XPC's function have been elucidated, there are still remain many  
150 mysteries to uncover, particularly in the context of diseased state. Lack of reliable human skin cell  
151 models for XP-C disease, along with a strong mirror control, necessitates their creation. This is  
152 essential for investigating the disease phenotype, such as molecular perturbations and cellular  
153 transformations. Various research groups have utilized primary human XP-C mutated  
154 keratinocytes and fibroblasts from patients<sup>17,18</sup>. However, the challenge lies in the fact that XP-C  
155 disease affects the entire body, and the absence of a wild-type control group with a similar genetic  
156 background makes it difficult to study several molecular aspects directly associated with XP-C  
157 disease. Additionally, the use of XP-C mutated fibroblasts from mice is also hindered by the  
158 differences in genetic makeup and skin architecture with humans<sup>19</sup>, presenting another obstacle.  
159 To overcome these barriers, precise genome editing would be of main interest to generate a  
160 reproducible XP-C disease model.

161  
162 The emergence of CRISPR-Cas9 in 2012 revolutionized molecular genetics and has since become  
163 an indispensable tool for precise genetic modifications. The CRISPR-Cas9 system consists of two  
164 key components: a DNA nuclease known as Cas9, often referred to as the "molecular scissors",  
165 and a single-stranded guide RNA (sgRNA). This sgRNA is specifically designed to guide Cas9 to  
166 particular DNA sequences of interest. By introducing the Cas9 protein transiently along with  
167 customized gRNAs that bind to target DNA sequences, a ribonucleoprotein complex (RNP) is  
168 formed. This complex can induce double-stranded breaks at precise locations in the DNA. In the  
169 CRISPR-Cas9 genome editing process, the cell's DNA repair mechanism comes into play to repair  
170 the DNA break created by Cas9. This repair mechanism, known as non-homologous end joining  
171 (NHEJ), often leads to deletions or insertions in the DNA, resulting in gene disruption<sup>20</sup>. To  
172 perform functional genetics using CRISPR, specific sgRNAs are designed to target the gene(s) of  
173 interest and are produced alongside the Cas9 protein. When successful, these sgRNAs induce  
174 mutations in the target gene(s), generating loss-of-function alleles that can be further characterized  
175 after genome editing.

176

177 Taking advantage from this versatile tool, our research focused on knocking out the *XPC* gene in  
178 various human immortalized skin cells, including keratinocytes, fibroblasts, and melanocytes,  
179 using the RNP strategy. After achieving a high efficacy in editing the *XPC* gene, the knockout was  
180 validated through diverse analyses, including immunofluorescence, RT-qPCR, western blot, and  
181 Sanger sequencing. Characterizing the XP-C disease phenotype involved the photosensitivity of  
182 XPC knockout cells following UVB irradiation in a dose- and time-dependent manner (24, 48, and  
183 72 hours). Additionally, the NER repair system impairment was quantified by analyzing 6-4PPs  
184 DNA damage 24 hours post-UVB irradiation using single-cell analysis. Moreover, the impact of  
185 XPC knockout on partially halting skin cells proliferation was elucidated. In order to accurately  
186 replicate the specific characteristics of this disease, we employed XPC knockout keratinocytes,  
187 fibroblasts, and melanocytes to construct a 3D reconstructed skin model. This model displayed an  
188 unusual profile, marked by significant degradation of its extracellular matrix in scaffold compared  
189 to the wild-type. To gain preliminary insights, we zoomed on analyzing a bunch of inflammatory  
190 markers present in the secretome of XPC knockout fibroblasts versus their associated wild-type  
191 cells, being the major cells involved influencing the skin microenvironment<sup>21</sup> to decipher the  
192 consequence underlying such degradation reflecting a strong shift in the inflammatory profile.

193  
194 Beyond establishing a robust XPC knockout model using human skin cells, we demonstrated a  
195 straightforward, cost-effective, and efficient method for modifying skin cells, with potential  
196 applications for editing other genes of interest.

## 197 Results

### 198 Generation of a Complete XPC CRISPR-Cas9 KO in Human Keratinocyte, 199 Fibroblast and Melanocyte Cell Lines

200  
201 Several methods exist for introducing foreign genetic material into cells, with electroporation  
202 being one such approach<sup>22</sup>. In this study, we examined the editing efficiency of human  
203 immortalized skin keratinocytes (N/TERT-2G) by electroporating them with a ribonucleoprotein  
204 complex consisting of Cas9 protein and sgRNA targeting the *XPC* gene at the exon three site. This  
205 procedure resulted in a highly effective editing outcome (~99%) in the edited heterogeneous cell  
206 population when compared to the wild-type cells (Figure 1A). The predominant form of frameshift  
207

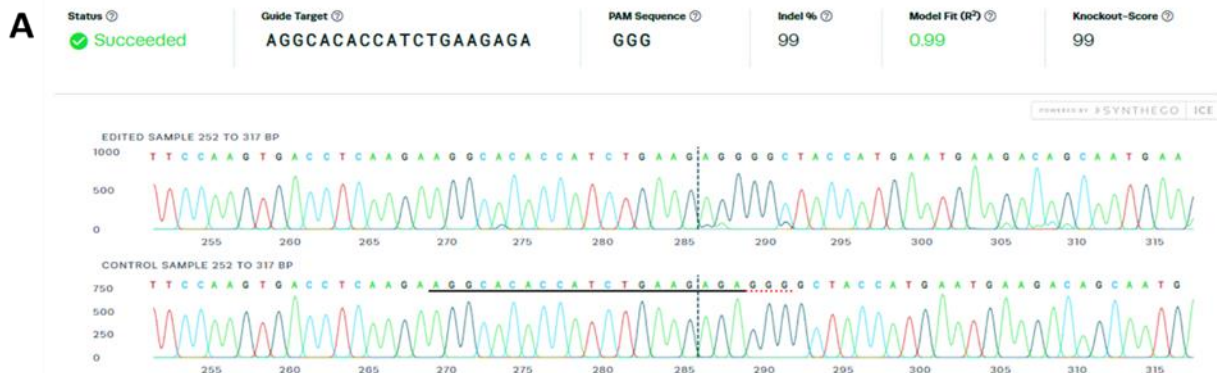



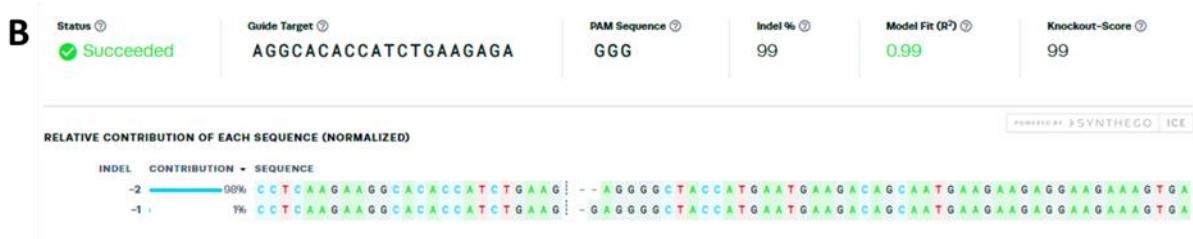

208  
209 **Figure 1. Sequencing analysis of N/TERT-2G XPC knockout (KO) heterogeneous population compared to**  
210 **wildtype.**

211 (A,B) The N/TERT-2G XPC knockout (KO) heterogeneous population subjected to Sanger sequencing and compared to the wild-  
212 type DNA sequence. (A) The sgRNA target region, the PAM sequence, and the knockout score are highlighted. Comparison of both  
213 sequences showed a predominant two-nucleotide (AG) indel mutation, in the exon 3 site. (B) The percentage of distribution of edits  
214 (indels) in the DNA sequence of the N/TERT-2G XPC knockout (KO) heterogeneous population.

215  
216 mutation observed was deletion, with a distribution percentage of approximately two-nucleotide  
217 deletions (~98%), one-nucleotide deletions (~1%), and unedited sequences (~1%) (Figure  
218 1B). After observing the substantial editing effectiveness in the human immortalized keratinocyte  
219 cell line (N/TERT-2G), our interest extended to modeling XP-C disease in human immortalized  
220 fibroblast (S1F/TERT-1) and melanocyte (Mel-ST) cell lines so that we will have three different  
221 skin cell types from human origin and all being generated from the same immortalization strategy.  
222 This involved employing the same strategy and target site for the XPC gene, as illustrated (Figure  
223 2).

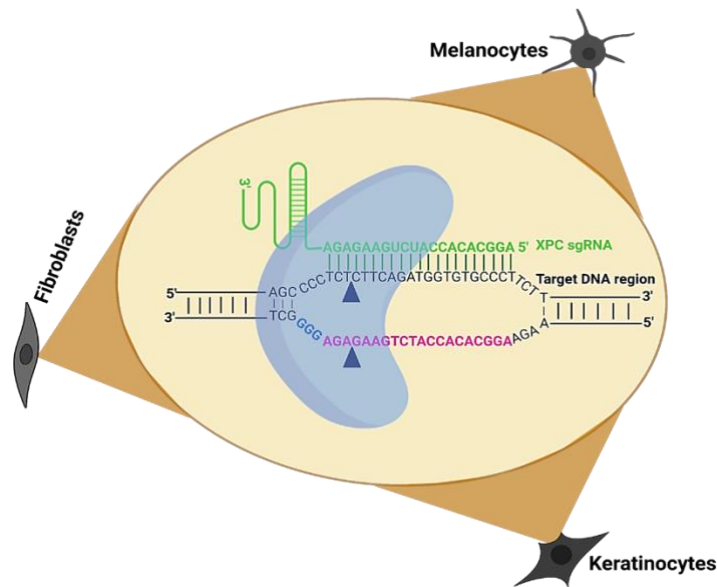

242 **Figure 2. Schematic representation of the target site of XPC gene to be edited in human immortalized**  
243 **keratinocytes, fibroblasts and melanocytes.**

245 A full homozygous knockout (KO) mutation of the XPC gene was successfully accomplished in  
246 human immortalized keratinocyte (N/TERT-2G), fibroblast (S1F/TERT-1), and melanocyte (Mel-  
247 ST) cell lines, employing the identical RNP strategy and the same sgRNA targeting exon three of  
248 the XPC gene. The edited heterogeneous populations of the three cell types underwent clonal  
249 expansion by either utilizing BD FACSMelody™ Cell Sorter or standard limiting serial dilution  
250 method to deposit a single cell in a 96-well plate. The individual single-cell clones were identified,  
251 monitored, and subsequently cultured for a period of 2 weeks for expansion. Seven single clones

252 from each cell type were stained with XPC antibody to detect the clones with a knockout. The  
253 quantification of fluorescence corresponding to the XPC protein expression level was carried out  
254 at the single cell level. For keratinocytes, five (clones 2,4,5,6, and 7) out of seven clones were  
255 knockout compared to the wild-type control (Figure 3A). Six for fibroblasts (1,2,3,4,6, and 7) and  
256 melanocytes (1,2,3,4,5, and 7) out of seven clones were having no XPC expression level compared  
257 to their wild-type controls (Figures 3B and 4C).

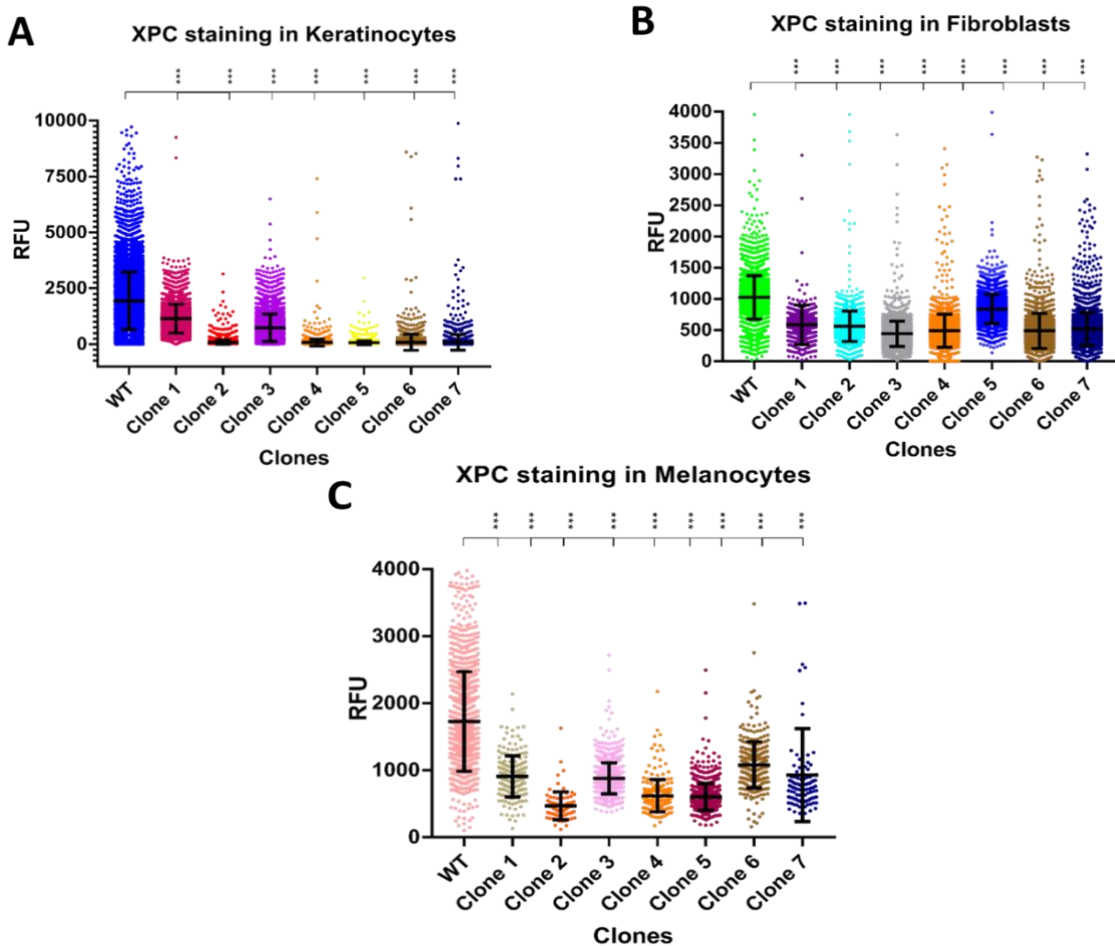

287 **Figure 3. (A,B,C) Selection of the XPC gene homozygous knockout (KO) clones in N/TERT-2G, S1F/TERT-1**  
288 **and Mel-ST cell lines.**

289  
290 (A) Selection of the XPC gene homozygous knockout (KO) clones in N/TERT-2G cell line. Five edited N/TERT-2G clones (2,4,5,6,  
291 and 7) showed an absence of XPC's relative fluorescence unit (RFU) compared to the wild-type (WT) control. (B) Selection of the  
292 XPC gene homozygous knockout (KO) clones in S1F/TERT-1 cell line. Six edited S1F/TERT-1 clones (1,2,3,4,6, and 7) showed an  
293 absence of XPC's relative fluorescence unit (RFU) compared to the wild-type (WT) control. (C) Selection of the XPC gene  
294 homozygous knockout (KO) clones in Mel-ST cell line. Six edited Mel-ST clones (1,2,3,4,5, and 7) showed an absence of XPC's  
295 relative fluorescence unit (RFU) compared to the wild-type (WT) control. \*\*\*  $p$ -value  $< 0.001$ . Student T test.

296  
297 These results reflect the robustness of the electroporation system when combined with the  
298 ribonucleoprotein complex editing strategy to knockout the XPC gene. One XPC knockout (KO)  
299 clone from each cell type underwent further selection to confirm the absence of XPC mRNA and

300 protein expression levels. RT-qPCR analyses revealed nearly absent XPC mRNA expression  
301 levels in N/TERT-2G (Figure 4A), S1F/TERT-1 (Figure 4B), and Mel-ST (Figure 4C) knockout  
302 clones when compared to their respective wild-type cells. Additionally, Immunofluorescence and  
303 western blot analyses for XPC protein (with a band size of 125 kDa) demonstrated the absence of  
304 expression in N/TERT-2G (Figures 4D, 4G, and 4J), S1F/TERT-1 (Figures 4E, 4H, and 4K), and  
305 Mel-ST (Figures 4F, 4I, and 4L) knockout clones when compared to their respective wild-type  
306 cells.

307

308

309

310

311

312

313

314

315

316

317

318

319

320

321

322

323

324

325

326

327

328

329

330

331

332

333

334

335

336

337

338

339

340

341

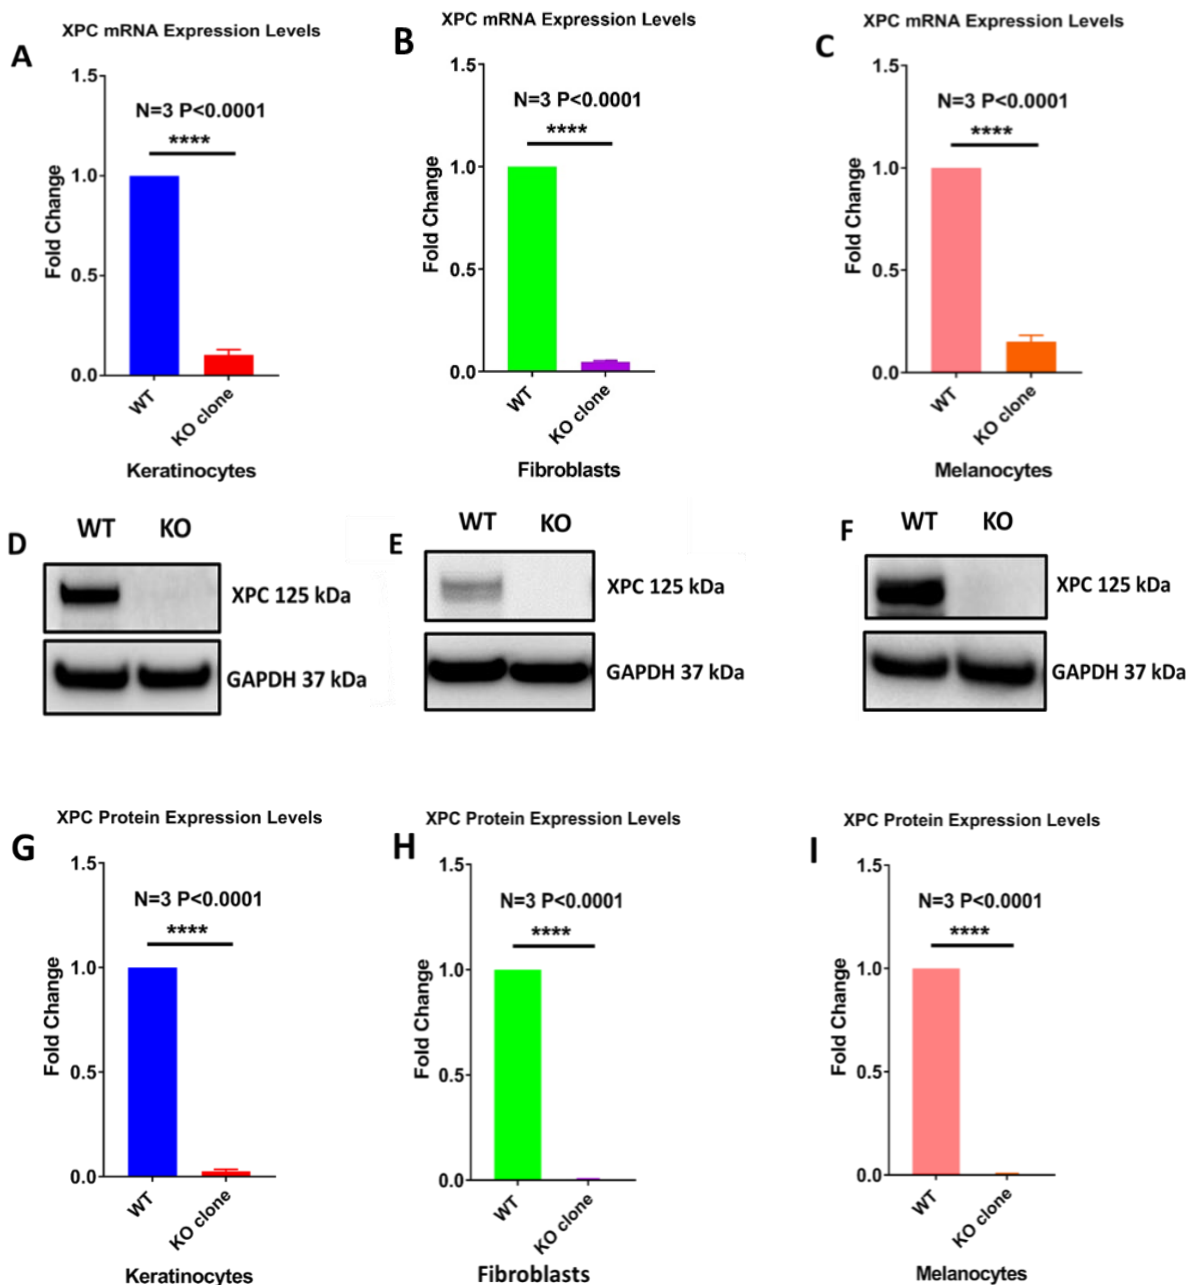



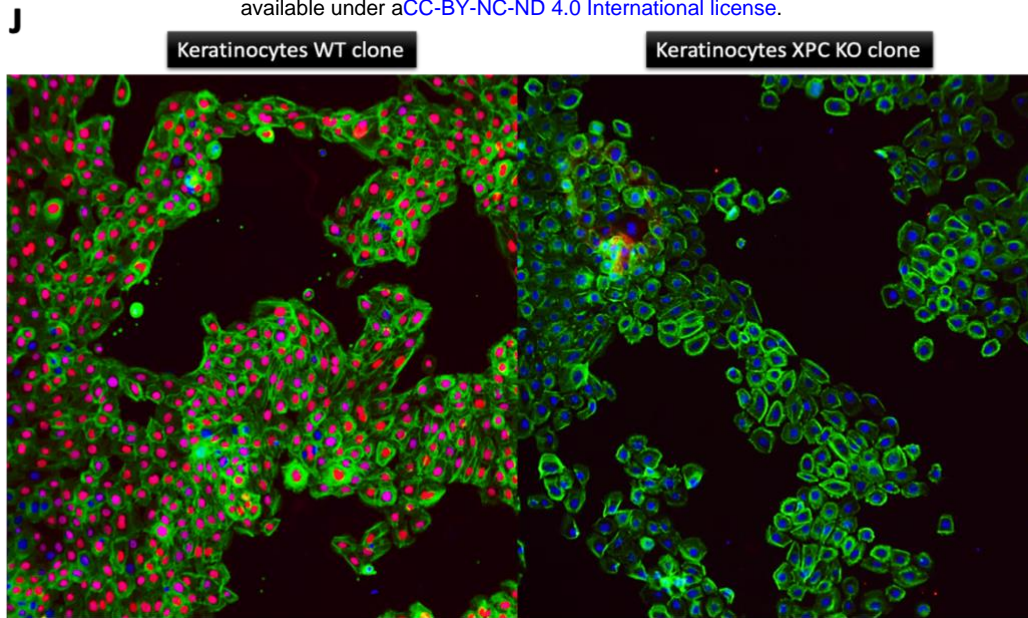

342  
343  
344  
345  
346  
347  
348  
349  
350  
351  
352  
353  
354  
355  
356  
357

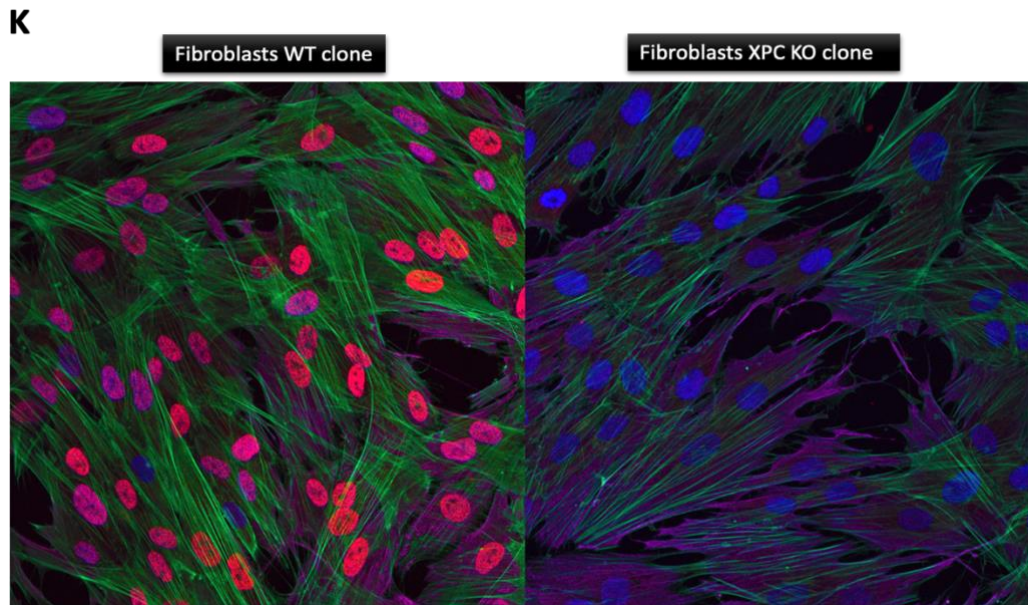

358  
359  
360  
361  
362  
363  
364  
365  
366  
367  
368  
369  
370  
371  
372  
373  
374  
375  
376  
377  
378

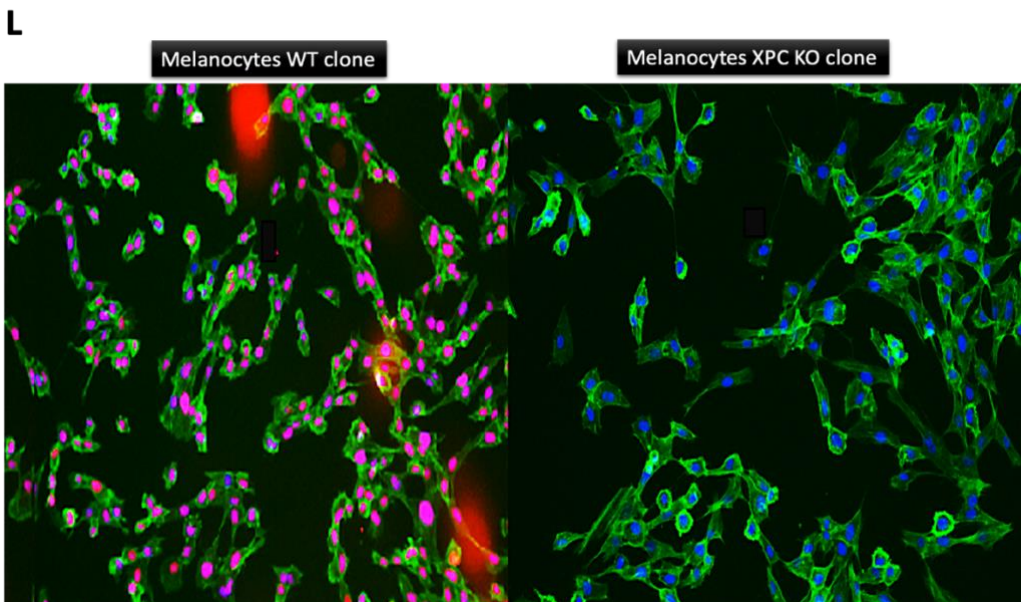

379  
380  
381  
382  
383  
384  
385  
386  
387  
388  
389  
390  
391  
392  
393  
394  
395  
396  
397

398 **Figure 4. Validation of XPC gene knockout (KO) in N/TERT-2G, S1F/TERT-1 and Mel-ST cell lines.**

399  
400 *The expression of XPC at the mRNA and protein level in keratinocyte, fibroblast, and melanocyte cell lines was examined. RT-*  
401 *qPCR analysis shows an absence of XPC's mRNA expression levels in keratinocytes (A), fibroblasts (B), and melanocytes (C)*  
402 *knockout clones compared to their associated wild-type cells (\*\*\*\*p-value<0.0001) unpaired t-test. Total mRNA content was*  
403 *extracted and reverse transcribed into cDNAs to further quantify the expression of XPC via qPCR. Western blot analysis shows*  
404 *an absence of XPC's protein expression levels in keratinocytes (D,G), fibroblasts (E,H), and melanocytes (F,I) knockout clones*  
405 *compared to their associated wild-type cells (\*\*\*\*p-value<0.0001) unpaired t-test. Cellular protein extracts were separated by*  
406 *SDS polyacrylamide gel electrophoresis (PAGE) and transferred onto a nitrocellulose membrane. The presence or absence of XPC*  
407 *(band size 125 kDa), and the housekeeping protein GAPDH (band size 37 kDa) was visualized using specific antibodies (GAPDH*  
408 *as control). Immunofluorescence stain shows the absence of XPC protein in the nucleus of keratinocytes (J), fibroblasts (K), and*  
409 *melanocytes (L) knockout clones (on the right side) compared to that of their associated wild-type cells (on the left side). All cell*  
410 *types were stained with primary XPC antibody (cy3 in red-purple), phalloidin for the cytoplasm (green), and primary vimentin*  
411 *antibody for fibroblasts (cy5 in light purple). Hoechst was also used to stain the nucleus (in blue). With either 4X or 10X*  
412 *magnification, Image acquisition was done using Cell-insight NXT.*  
413

414 **Characterization of Wild Type and XPC KO Keratinocyte, Fibroblast and**  
415 **Melanocyte cell lines**

416  
417 **Photosensitivity**

418  
419 Based on the literature, XP-C mutated cells display an elevated sensitivity to UVB radiation  
420 stemming from the deficiency of the XPC protein<sup>17</sup>. To validate these traits and replicate XP-C  
421 disease, we initially examined the photosensitivity profile after UVB exposure in wild-type and  
422 XPC knockout keratinocytes, fibroblasts, and melanocytes. Cells from each type were cultured  
423 until reaching 80% confluence and then subjected to varying doses of UVB (100, 200, 500, 1000,  
424 4000 J/m<sup>2</sup> for keratinocytes and melanocytes, and 200, 300, 500, 700, 1000, 4000, 15000 J/m<sup>2</sup> for  
425 fibroblasts). This allowed us to assess photosensitivity in a dose- and time-dependent manner (24,  
426 48, and 72 hours). Elevated doses of UVB exposure led to decreased viability in all cell types,  
427 including both wild-type and XPC knockout (KO) cells. XPC KO keratinocytes and melanocytes  
428 exhibited an increased photosensitivity, displaying a significantly sharper (p<0.001) decline in  
429 viability at each UVB dose and across the specified time intervals compared to their wild-type  
430 counterparts. Conversely, there was minimal disparity in photosensitivity between wild-type and  
431 XPC KO fibroblasts across the three-time intervals (24, 48, and 72 hours).

432 In the case of keratinocytes, XPC KO cells demonstrated a lower LD50 (154.3 J/m<sup>2</sup>) compared to  
433 wild-type cells, which required a substantially higher dose (353.6 J/m<sup>2</sup>) to induce an equivalent  
434 50% lethality after 24 hours of UVB irradiation (Figure 5A). Following 48 hours of UVB exposure,  
435 XPC KO cells displayed a more hypersensitive phenotype compared to both wild-type cells and  
436 their own state at 24 hours, evident in the divergence of the graphical curves between the two cell  
437 types. Additionally, XPC KO cells exhibited a reduced LD50 (102.9 J/m<sup>2</sup>) in contrast to wild-type  
438 cells, which necessitated a substantially higher dose (317.2 J/m<sup>2</sup>) to achieve an equivalent 50%  
439 lethality after 48 hours of UVB irradiation (Figure 5B). Moreover, following 72 hours of UVB  
440 exposure, XPC KO cells demonstrated the most pronounced hypersensitive phenotype compared  
441 to wild-type cells, as well as in comparison to the 24- and 48-hour time points. This heightened  
442 sensitivity is evident in the separation of the graphical curves between the two cell types,  
443 particularly noticeable at a dose of 200 J/m<sup>2</sup>. Furthermore, XPC KO cells displayed a lower LD50  
444 (135.2 J/m<sup>2</sup>) relative to wild-type cells, which required a significantly higher dose (329.5 J/m<sup>2</sup>) to  
445 induce an equal 50% lethality after 72 hours of UVB irradiation (Figure 5C).



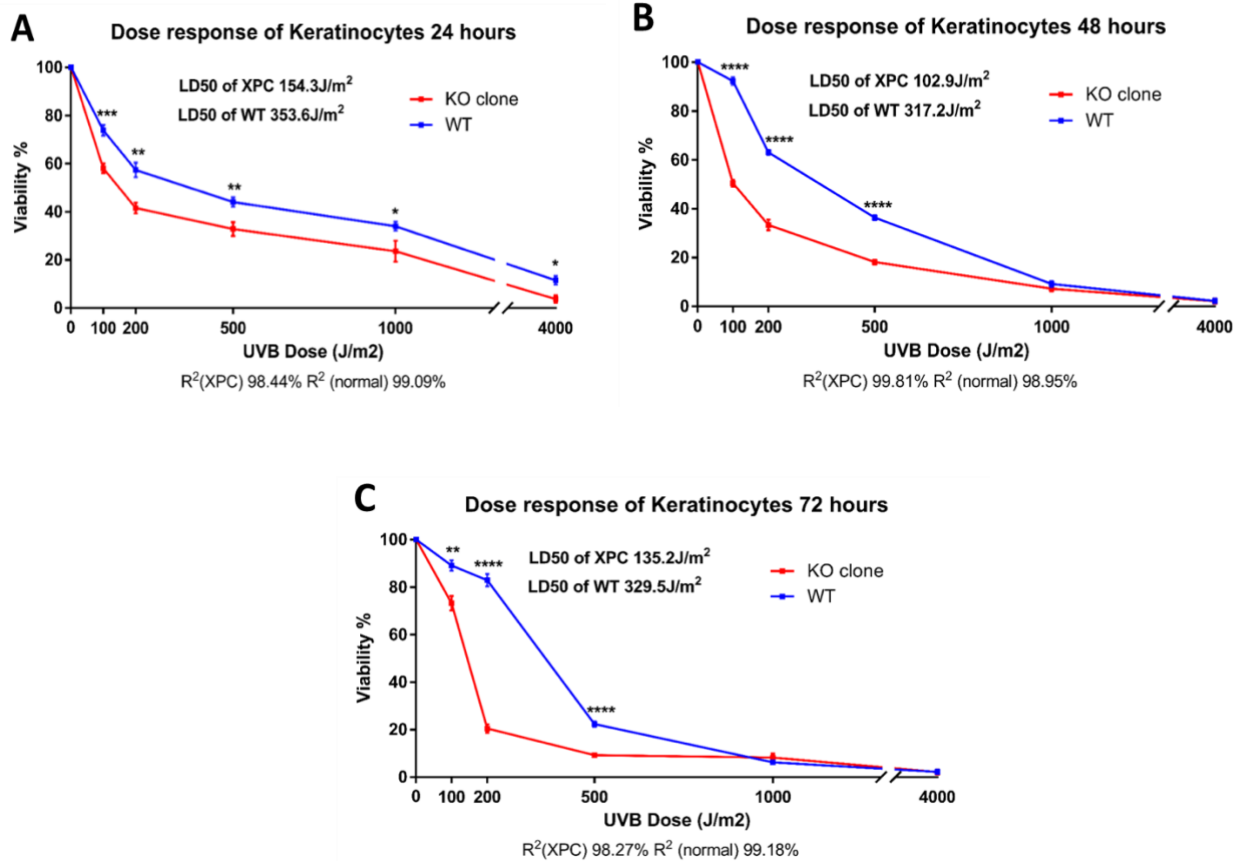

**Figure 5. XPC KO N/TERT-2G keratinocyte cells manifest increased hypersensitivity to UVB irradiation in a dose and time dependent manner.**

(A) Viability of keratinocytes 24h post UVB irradiation. (B) Viability of keratinocytes 48h post UVB irradiation. (C) Viability of keratinocytes 72h post UVB irradiation. Both XPC KO and wild-type cells were seeded in 6 well plates to be irradiated at 80% confluence with increasing UVB doses. Cells were exposed to various doses of UVB and their viability was assessed after 24, 48, and 72 hours through incubation with trypan blue. XPC knockout (KO) cells demonstrated a notably steeper and statistically significant reduction in viability with rising UVB doses compared to wild-type cells. Viability was determined as a percentage of the control, with non-irradiated cells representing 100% viability. Statistical analysis revealed a highly significant difference \**p*-value<0.05, \*\**p*-value<0.01, \*\*\**p*-value<0.001, \*\*\*\**p*-value<0.0001 (unpaired t-test). The reported results are the average of three separate biological experiments (N=3).

In the case of melanocytes, XPC knockout (KO) cells exhibited a reduced LD50 (251.3 J/m<sup>2</sup>) in contrast to wild-type cells, which needed a significantly higher dose (848.6 J/m<sup>2</sup>) to achieve a 50% lethality rate after 24 hours of UVB exposure (Figure 6A). Following 48 hours of UVB exposure, XPC KO cells displayed more photosensitivity compared to wild-type cells, as well as in comparison to their sensitivity at 24 hours. This heightened sensitivity is evident from the distinct separation of the graphical curves between both cell types, especially beyond a dose of 100 J/m<sup>2</sup>. Furthermore, XPC KO cells also demonstrated a decreased LD50 (79.43 J/m<sup>2</sup>) compared to wild-type cells, which required a significantly higher dose (244.7 J/m<sup>2</sup>) to achieve a 50% lethality rate after 48 hours of UVB exposure (as indicated in Figure 6B). Additionally, after 72 hours of UVB exposure, XPC KO cells displayed the most pronounced hypersensitive phenotype when compared to wild-type cells and their state at 24 and 48 hours. This increased sensitivity is evident from the clear divergence of the graphical curves between both cell types, particularly at a dose of 100 J/m<sup>2</sup>, where the viability of XPC KO cells dropped to nearly 20%, while wild-type cells remained at around 100%. Moreover, XPC KO cells exhibited the lowest LD50 (33.82 J/m<sup>2</sup>) in

495  
496  
497  
498  
499  
500  
501  
502  
503  
504  
505  
506  
507  
508  
509  
510  
511  
512  
513  
514  
515  
516  
517  
518  
519  
520  
521  
522

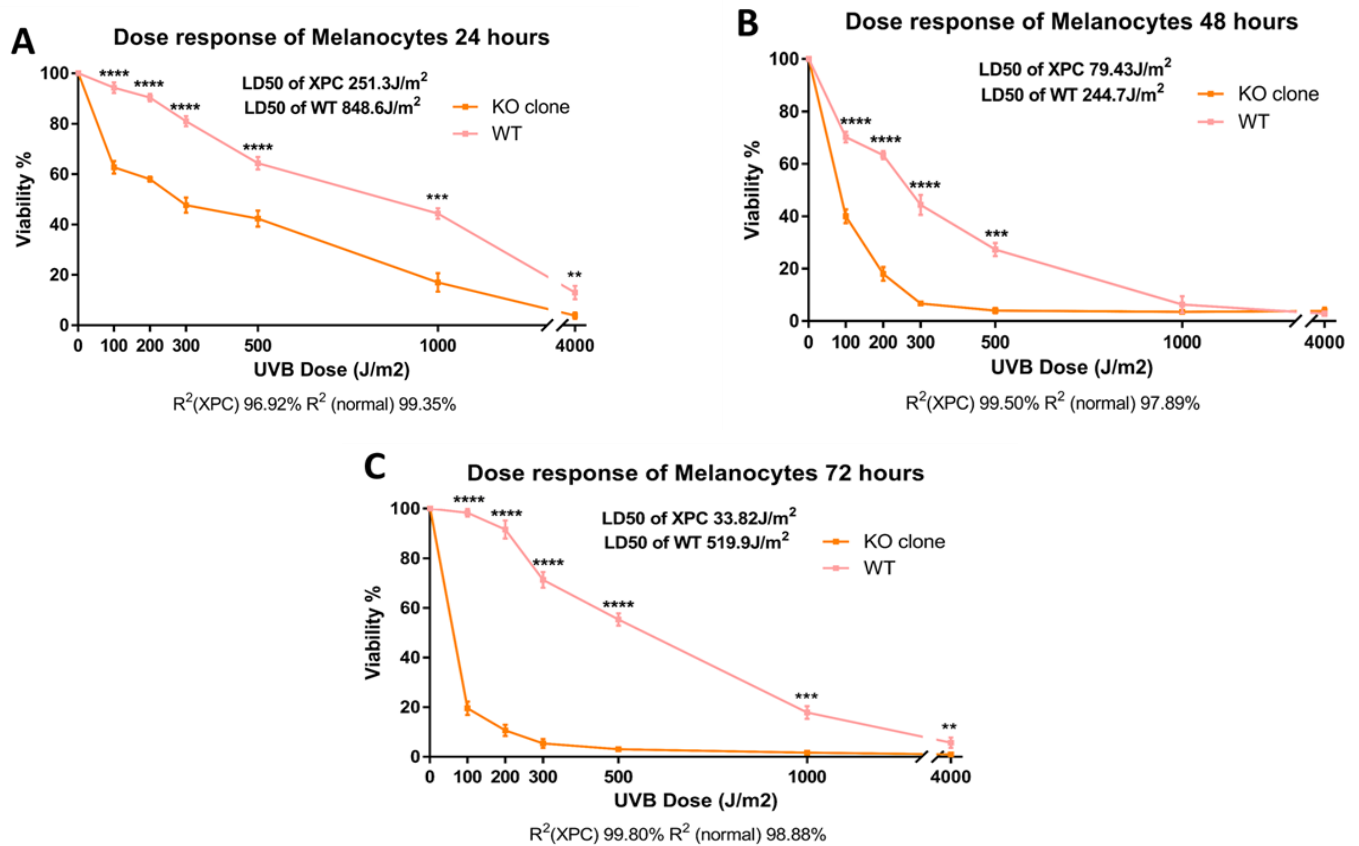

**Figure 6. XPC KO Mel-ST melanocyte cells manifest increased hypersensitivity to UVB irradiation in a dose and time dependent manner.**

(A) Viability of melanocytes 24h post UVB irradiation. (B) Viability of melanocytes 48h post UVB irradiation. (C) Viability of melanocytes 72h post UVB irradiation. Both XPC KO and wild-type cells were seeded in 6 well plates to be irradiated at 80% confluence with increasing UVB doses. Cells were exposed to varying doses and their viability was assessed at 24, 48, and 72-hour intervals using trypan blue incubation. XPC knockout (KO) cells exhibited a more pronounced and statistically significant reduction in viability as the UVB dose increased, in contrast to wild-type cells. Viability was determined by calculating the percentage in relation to the control, where non-irradiated cells represented 100% viability. The statistical significance was denoted as \*\*p-value<0.01, \*\*\*p-value<0.001, \*\*\*\*p-value<0.0001 (unpaired t-test). The findings are based on the average of three independent biological replicates (N=3).

contrast to wild-type cells, which needed a considerably higher dose (519.9 J/m<sup>2</sup>) to achieve a 50% lethality rate after 72 hours of UVB exposure (Figure 6C).

In the case of fibroblasts, the photosensitivity profile was somewhat less pronounced compared to what was observed for keratinocytes and melanocytes. Specifically, XPC knockout (KO) cells exhibited a slightly lower LD50 (1359 J/m<sup>2</sup>) in contrast to wild-type cells, which required a slightly higher dose (1778 J/m<sup>2</sup>) to achieve a 50% lethality rate after 24 hours of UVB irradiation (Figure 7A). Following 48 hours of UVB exposure, XPC KO cells displayed a very slight, yet noticeable, hypersensitivity when compared to wild-type cells, especially at a dose of 4000 J/m<sup>2</sup>. Additionally, XPC KO cells also showed a lower LD50 (948.5 J/m<sup>2</sup>) compared to wild-type cells, which required

545

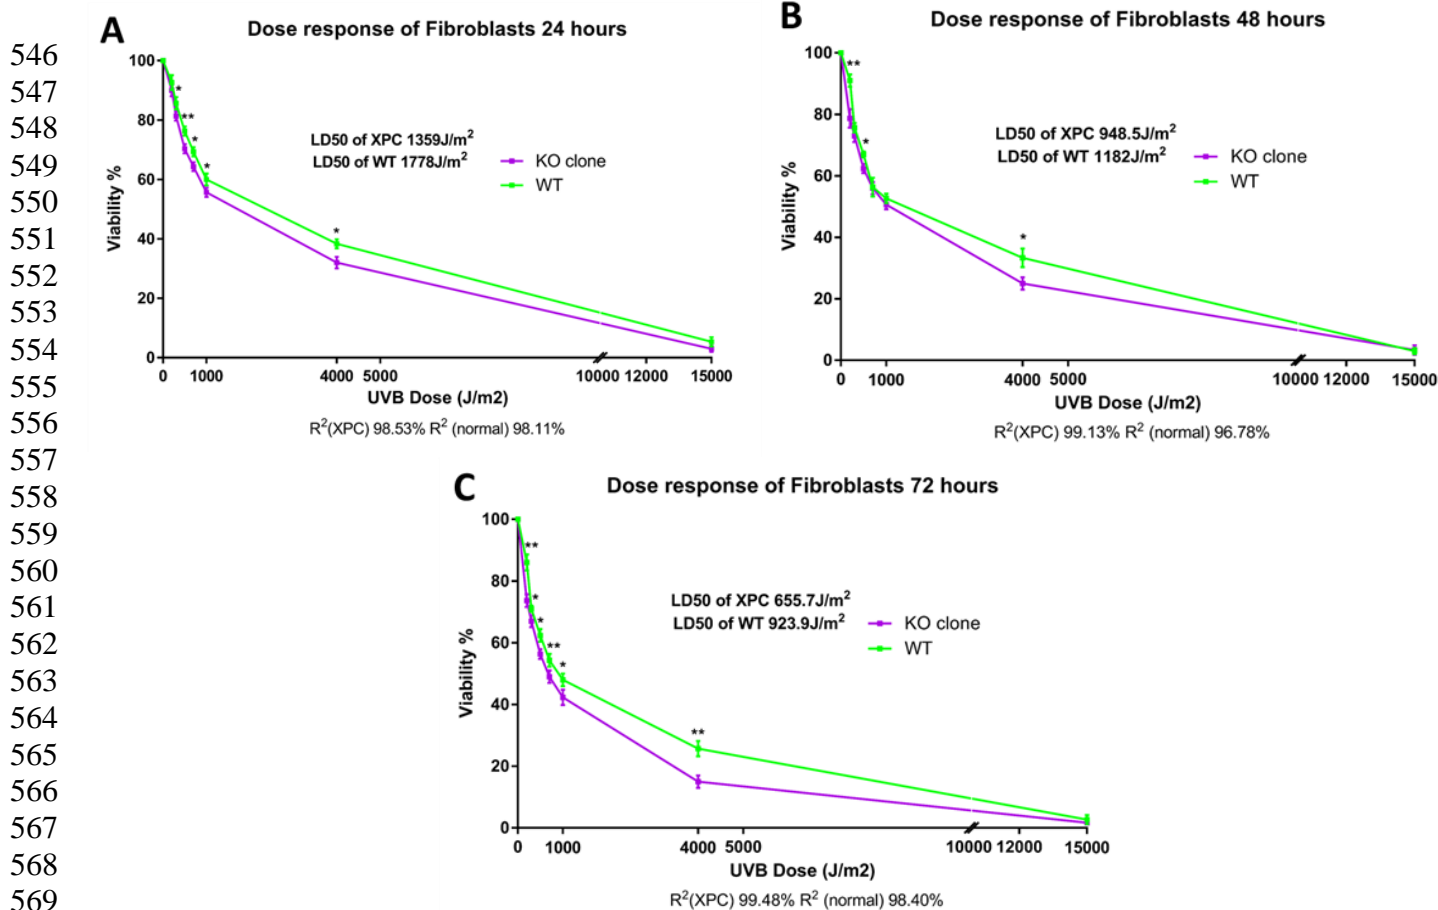

**Figure 7. XPC KO S1F/TERT-1 fibroblast cells manifest a slight hypersensitivity to UVB irradiation in a dose and time dependent manner.**

(A) Viability of fibroblasts 24h post UVB irradiation. (B) Viability of fibroblasts 48h post UVB irradiation. (C) Viability of fibroblasts 72h post UVB irradiation. Both XPC KO and wild-type cells were seeded in 6 well plates to be irradiated at 80% confluence with increasing UVB doses. The cells were exposed to varying doses, and their viability was assessed after 24, 48, and 72 hours by utilizing trypan blue incubation. Notably, XPC knockout (KO) cells exhibited slight statistically significant reduction in viability as the UVB dose increased, as compared to the wild-type cells. Viability was determined by calculating the percentage in relation to the control, where non-irradiated cells were considered to have 100% viability. The statistical significance was indicated as \**p*-value<0.05, \*\**p*-value<0.01 (unpaired *t*-test). The presented results are the average of three independent biological replicates (*N*=3).

a slightly higher dose (1182 J/m<sup>2</sup>) to reach a 50% fatality rate after 48 hours of UVB irradiation (Figure 7B). Finally, after 72 hours of UVB irradiation, XPC KO cells exhibited a heightened sensitivity compared to both wild-type cells and their sensitivity at 24 and 48 hours. Moreover, XPC KO cells demonstrated the lowest LD50 (655.7 J/m<sup>2</sup>) in contrast to wild-type cells, which needed a considerably higher dose (923.9 J/m<sup>2</sup>) to achieve a 50% fatality rate after 72 hours of UVB irradiation (Figure 7C).

## 6-4PPs Repair Capacity

As previously mentioned, XPC protein plays a pivotal role as a key sensor in the initial recognition phase of the global genome repair pathway, which addresses UV-induced photoproducts<sup>17</sup>. Our objective was to investigate how the XPC KO mutation impacted the DNA damage repair kinetics



594 resulting from UVB irradiation in the three types of XPC KO cells (keratinocytes, fibroblasts, and  
595 melanocytes) to model XP-C disease. UVB exposure primarily generates two major photo-lesions:  
596 6-4 photoproducts (6-4PPs) and cyclobutane pyrimidine dimers (CPDs). These two lesions exhibit  
597 distinct structural characteristics, with 6-4 photoproducts (6-4PPs) causing a more pronounced  
598 distortion of the DNA helix (a 44° bend) compared to cyclobutane pyrimidine dimers (CPDs),  
599 which induce a milder helix distortion of (a 9° bend). The differential distortion in DNA makes it  
600 easier for XPC to recognize 6-4PPs compared to CPDs.  
601 Furthermore, 6-4PPs are considerably more efficiently repaired by nucleotide excision repair  
602 (NER) mechanisms, with a half-life of 2 hours for 6-4PPs compared to 33 hours for CPDs<sup>4</sup>.  
603 Therefore, for future experiments, we determined that focusing on 6-4PPs would be a more  
604 compelling approach for assessing the outcomes and can be of main interest for future therapeutic  
605 strategies taking advantage of the short follow-up timing accompanied with the 24 hour readout  
606 following UVB exposure as shown here<sup>23</sup>, as CPDs require a longer follow-up time.

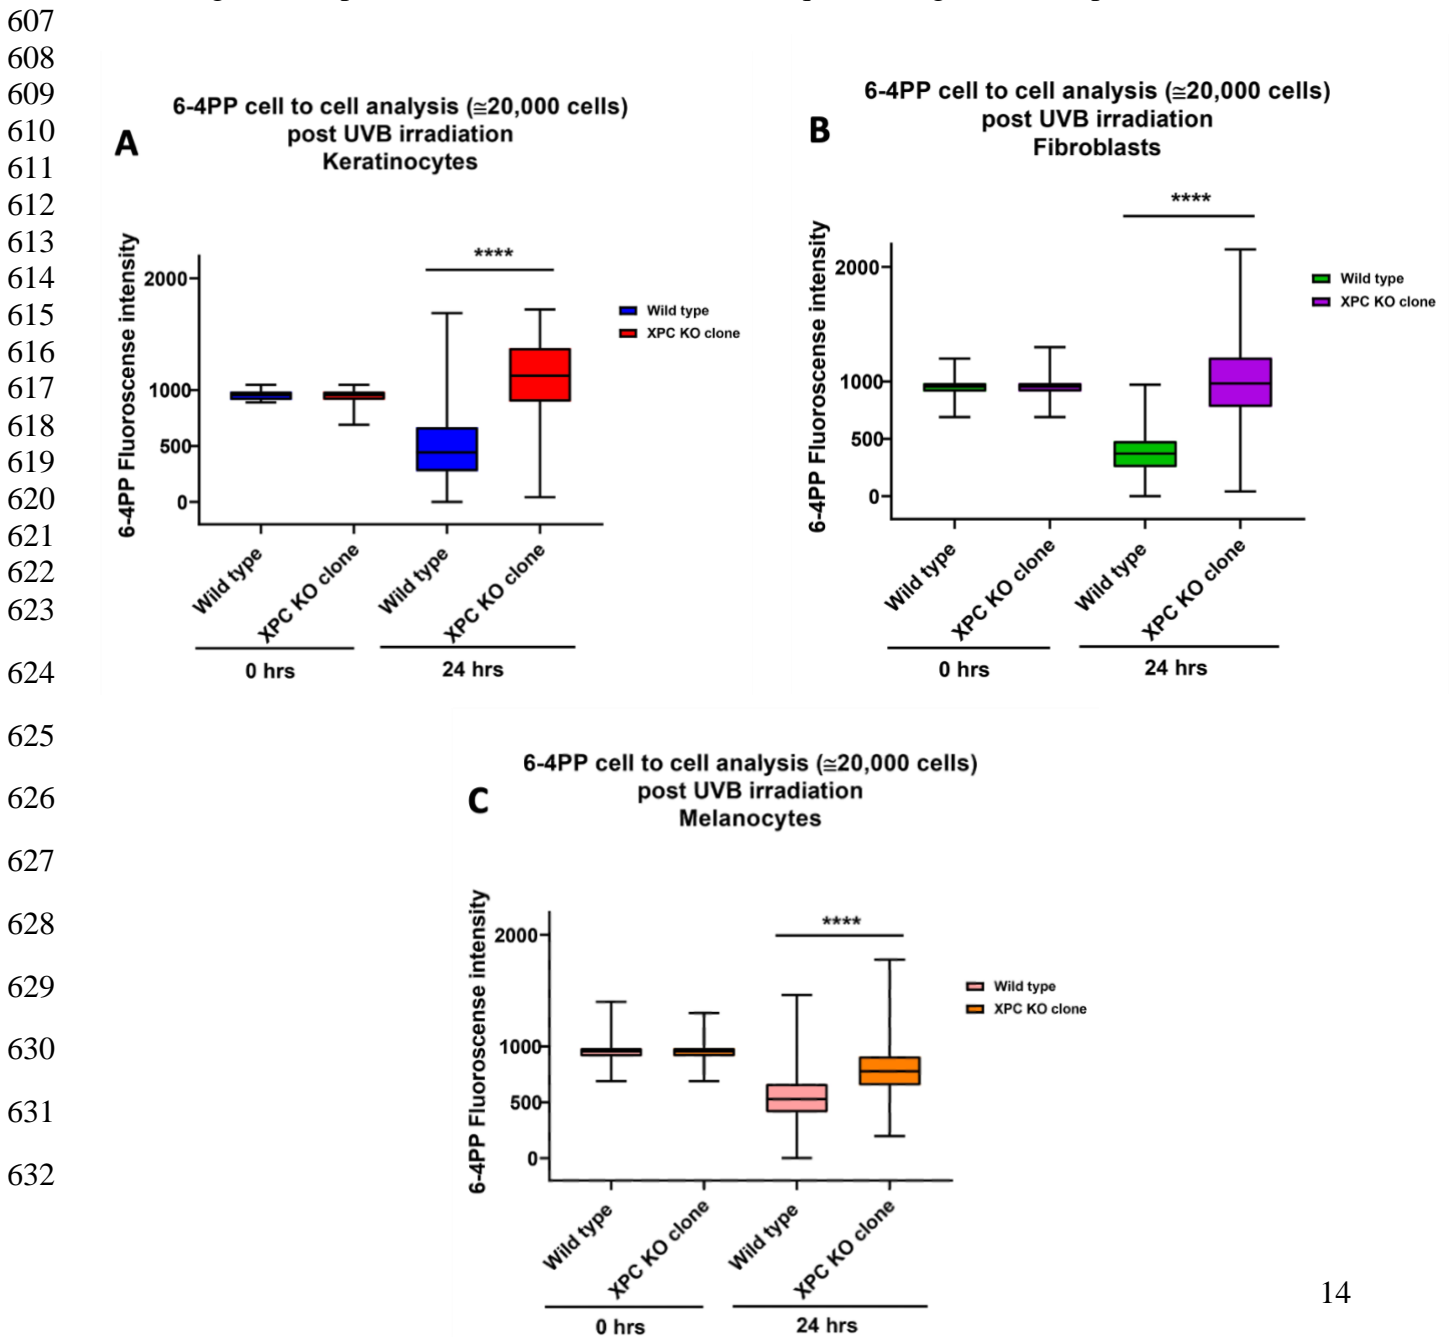

633 **Figure 8. XPC KO N/TERT-2G keratinocyte, S1F/TERT-1 fibroblast, and Mel-ST melanocyte cells manifest a**  
634 **significantly persistent and unrepaired 6-4PPs post 24 hours of UVB irradiation.**

635 *(A,B,C) 6-4PPs repair assay in wild-type and XPC KO keratinocytes, fibroblasts, and melanocytes. XPC knockout in keratinocytes*  
636 *(A), fibroblasts (B), and melanocytes (C) resulted in a notably persistent and unrepaired UVB-induced 6-4PPs lesions (fluorescence*  
637 *intensity) compared to their respective wild-type cells 24 hours after UVB irradiation. It is noteworthy that all cell types displayed*  
638 *similar levels of 6-4PPs at 0 hours post-UVB irradiation. To test the repair capacity, both wild type and XPC KO cells from each*  
639 *cell line and type were seeded to reach 80% confluence. Afterwards, these cells were subjected to UVB irradiation. Following UVB*  
640 *irradiation at time 0h and after 24 hours, cells were further stained based on the protocol, which comprises the fixation of the cells*  
641 *using 4% paraformaldehyde and 0.2% of Triton X-100 to permeabilize the cells. 2M HCL was then utilized to fully denature the*  
642 *DNA double helix, enhancing the access of the antibody targeting DNA damage caused by UVB irradiation. After the saturation*  
643 *process, cells were incubated overnight with primary 6-4PP antibody. Secondary mouse antibody FITC was then added the next*  
644 *day. Single-cell analysis was carried out via quantifying nuclear DNA damage in several individual cells per condition and were*  
645 *constructed as box plots. \*\*\*\*  $p < 0.0001$  unpaired t-test. The reported results are the average of three separate biological*  
646 *experiments (N=3).*

647  
648 To assess DNA damage, wild-type and XPC KO N/TERT-2G keratinocytes and Mel-ST  
649 melanocytes were exposed to a dose of 150 J/m<sup>2</sup>, while S1F/TERT-1 fibroblasts were exposed to  
650 a dose of 300 J/m<sup>2</sup>. This choice of doses was based on their relatively higher resistance compared  
651 to melanocytes and keratinocytes, as determined through dose-response curve analysis. The  
652 purpose of using these doses was to induce DNA damage adaptable with the percentage of cellular  
653 mortality, allowing for the quantification of 6-4PPs through single-cell fluorescence analysis,  
654 measuring the relative fluorescence unit (RFU) after immunofluorescence staining.

655 At the initial 0-hour time point after exposure to UVB irradiation, immunocytochemistry staining  
656 of 6-4PPs revealed comparable levels of accumulated DNA damage in XPC KO keratinocytes  
657 (Figure 8A), fibroblasts (Figure 8B), and melanocytes (Figure 8C). However, after 24 hours of  
658 UVB irradiation, wild-type cells demonstrated the ability to repair 6-4PPs, unlike XPC KO cells,  
659 which exhibited a deficiency in 6-4PPs repair. This indicates a noticeable lag or absence in the 6-  
660 4PPs repair capacity of XPC KO cells compared to their corresponding wild-type cells.

661  
662 **Proliferation Status**

663  
664 After a brief period following XPC knockout, our microscopic analysis revealed a visually  
665 significant halt in the proliferation/growth capacity of the three types of XPC knockout skin cells,  
666 as opposed to their respective wild-type counterparts. To confirm this impact, we conducted a 5-  
667 hour EDU assay on both wild-type and XPC KO cell types, followed by the analysis of EDU  
668 incorporation. It was observed that wild-type cells exhibited significantly higher EDU  
669 incorporation, implying more proliferation in keratinocytes (Figure 9A), fibroblasts (Figure 9B),  
670 and melanocytes (Figure 9C) compared to the knockout clones. Out of 100% for keratinocytes,  
671 wild-type EDU-positive cells were 51%, whilst 32% for the XPC KO cells. Out of 100% for  
672 fibroblasts, wild-type EDU-positive cells were 55%, whilst 41% for the XPC KO cells. Out of  
673 100% for melanocytes, wild-type EDU-positive cells were 64%, whilst 44% for the XPC KO cells.  
674 This emphasizes the significance of XPC in influencing the multiplication of skin cells, presenting  
675 it as a novel strategy for characterization as well.

676  
677  
678  
679  
680  
681

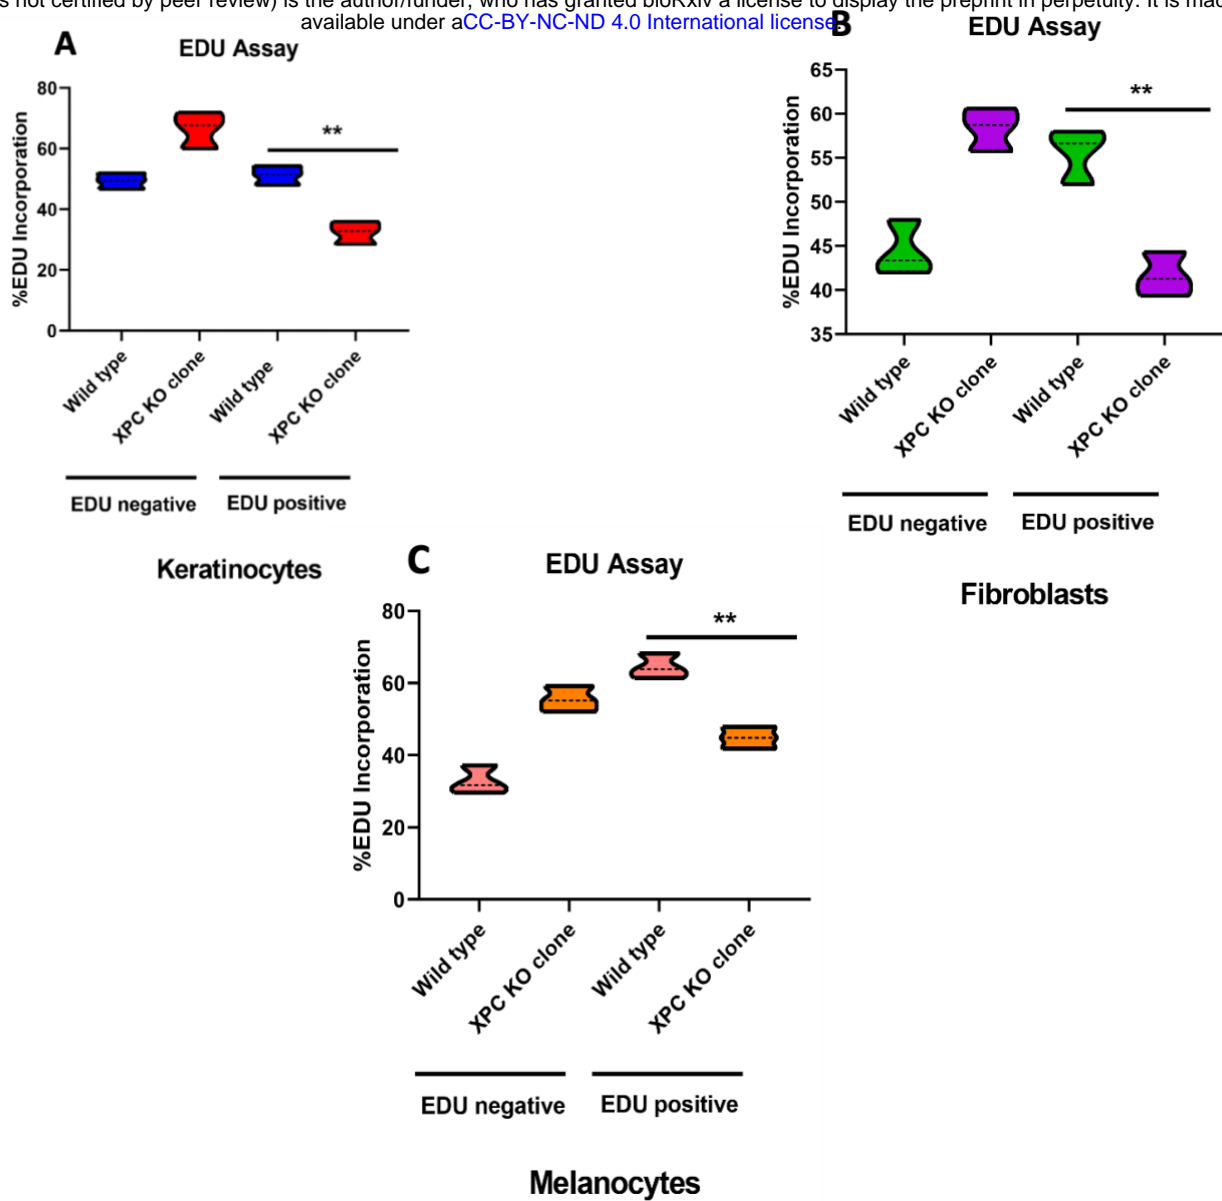

**Figure 9. XPC KO manifests a partial halting in the proliferative capacity of N/TERT-2G keratinocytes, S1F/TERT-1 fibroblasts, and Mel-ST melanocytes.**

(A,B,C) EDU incorporation assay for wild-type and XPC KO keratinocytes, fibroblasts, and melanocytes. An EDU assay was carried out to determine the effect of XPC KO mutation on the proliferative capacity of human immortalized skin cells (keratinocytes, fibroblasts and melanocytes). The incorporation of the nucleoside analog EDU into the cells can be used to determine the health and genotoxicity of the cells. A click-it covalent reaction between an azide and an alkyne, which copper catalyzes, can further quantify the incorporation of the nucleoside analog EDU. To do that, wild-type and XPC KO of each cell type were seeded in 6 well plates to reach 50% of confluence. Afterwards, EDU was diluted and added to the cell media for 5 hours. Cells were then trypsinized, harvested, and stained according to the manufacturer's protocol. The readout was done using flow cytometry (FACScan, BD LSRII flow cytometer, BD Biosciences). The post-analysis was done using flowing software (Turku Bioimaging, Finland). \*\* $p$ -value < 0.01 (unpaired  $t$ -test). The results presented are the mean of three biological replicates ( $N=3$ ).

## 728 XPC KO Induces ECM Scaffold Degradation in 3D Reconstructed Skin 729 Models

730

731 Conducting research on cells in a 2D culture is essential, but this approach is limited by its inability  
732 to accurately replicate conditions found in the human body. Additionally, the rarity of XP-C  
733 disease poses challenges in obtaining skin samples from patients for analysis. As an alternative, a  
734 3D reconstructed skin model with XPC knockout (KO) cells derived from amplified 2D cultures  
735 can be generated. This model offers researchers a more physiologically relevant representation and  
736 provides the opportunity to employ additional constructs for experimentation, enabling a deeper  
737 understanding of the mechanisms activated by XPC mutation. The workflow (Figure 10) consists  
738 of seeding separately wild-type and XPC KO fibroblasts, being embedded in a specific gel termed  
739 fibrin, in an insert support to permit the formation of the dermal equivalent. This process lasts 10-  
740 12 days, allowing sufficient proliferation and extracellular matrix production. Afterwards, wild-  
741 type and XPC KO melanocytes and keratinocytes are mixed together (each separately), and both  
742 cell types are seeded on the top of either the wild-type or XPC KO dermal equivalent and kept for  
743 4-5 days to proliferate in immersed culture. After that, they are switched to the air liquid interface  
744 stage for 10 days or more, where media is aspirated, allowing the epidermal differentiation process  
745 to produce either a full wild type or XPC KO 3D reconstructed skin model. At the step of the  
746 differentiation process, we observed that all the fibrin gels (N=10) of XPC KO skin cell types  
747 started to extensively degrade (Figure 10) compared to the wild type which did not show any of  
748 these features and had succeeded to harvest the skin architecture (data not shown here).

749

## 750 XPC KO Induces an Inflammatory Secretome Profile triggered by 751 Fibroblasts.

752

753 To formulate an initial interpretation of our observations, we referred to the findings reported by  
754 Thierry Magnaldo's group which indicated an increase in the expression of matrix  
755 metalloproteinase 1 (MMP-1) in XP-C fibroblasts<sup>24</sup>. To extend our analysis, we aimed to analyze  
756 a bunch of inflammatory cytokines (IL-1 $\beta$ , IFN- $\alpha$ 2, IFN- $\gamma$ , TNF- $\alpha$ , MCP-1, IL-6, IL-8, IL-10, IL-  
757 12, IL-17A, IL-18, IL-23, and IL-33) from the secretome, being well known to be stimulators of  
758 MMPs<sup>25,26</sup> of our XPC KO fibroblasts versus their associated wild-type cells following 24 hours  
759 of culture. Strikingly, we observed that almost all these cytokines were strongly induced following  
760 XPC KO implementing a strong inflammatory shift (Figure 11). In XPC knockout fibroblasts, the  
761 concentration of IFN- $\alpha$ 2 experienced a significant increase to 13,566 pg/ml, marking a 1.5-fold  
762 rise compared to their respective wild-type counterparts, which had a concentration of 8,982 pg/ml.  
763 Similarly, for IFN- $\gamma$ , the concentration surged to 8,866 pg/ml, indicating a 1.5-fold increase  
764 compared to the corresponding wild-type level of 5,935 pg/ml. As for IL-1 $\beta$ , its concentration  
765 dramatically increased to 11,000 pg/ml, showcasing a substantial 4.64-fold rise compared to the  
766 wild-type concentration of 2,368 pg/ml. IL-6 exhibited a noteworthy increase to 29 pg/ml,  
767 representing a substantial 6.50-fold elevation compared to the 6 pg/ml concentration in the wild-  
768 type counterparts. The concentration of IL-8 rose significantly to 43 pg/ml, reflecting a 5.3-fold  
769 increase compared to the 8 pg/ml concentration in their wild-type counterparts.

770

771

772

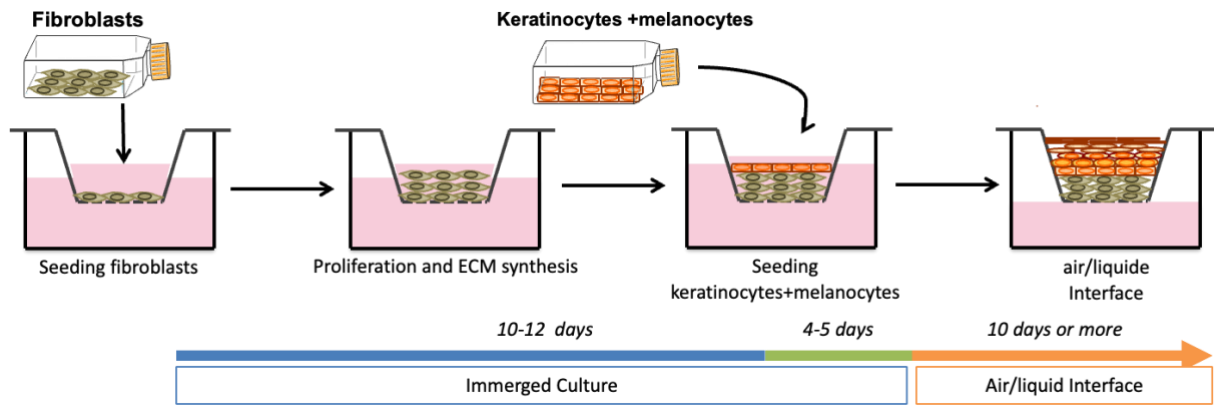

773

774

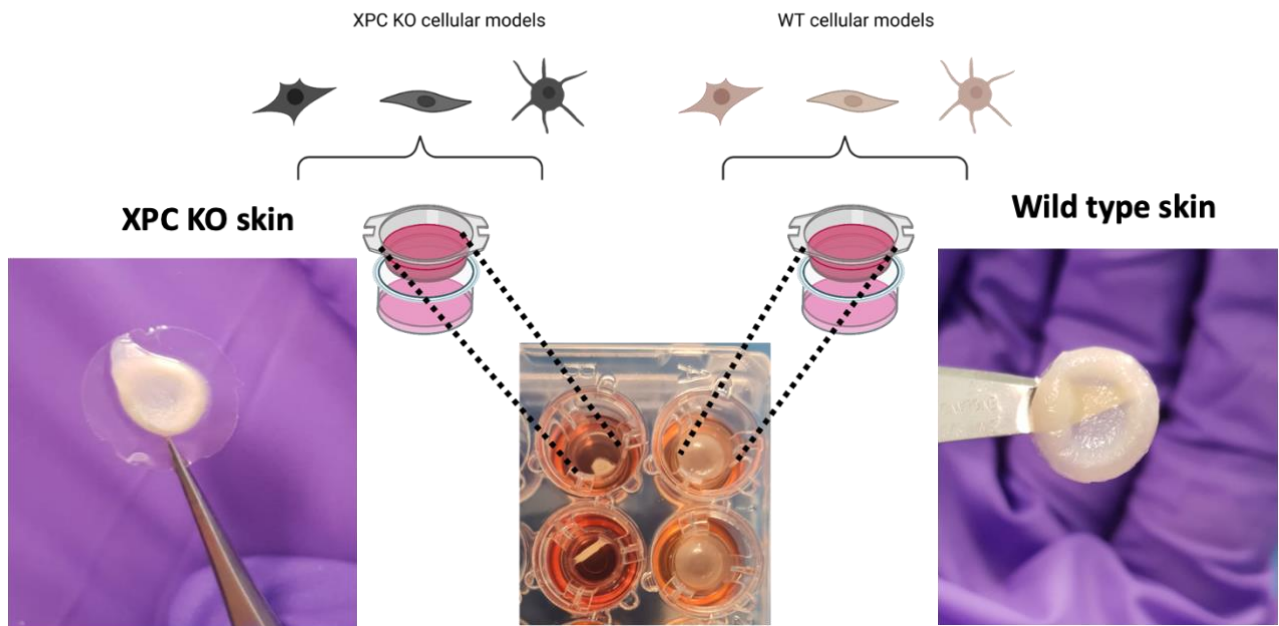

775

776 **Figure 10. Degradation of the fibrin gel in XPC KO skin model during differentiation processes.**

777

778 *The protocol consists of seeding separately wild type and XPC KO fibroblasts, being embedded in a specific gel termed fibrin, in*  
779 *insert support to permit the formation of the dermal equivalent. This process lasts 10-12 days, allowing sufficient proliferation and*  
780 *extracellular matrix production. Afterwards, wild-type and XPC KO melanocytes and keratinocytes are mixed (each separately),*  
781 *and both cell types are seeded on the top of either the wild-type or XPC KO dermal equivalent and kept for 4-5 days to proliferate*  
782 *in immerged culture. After that, they are switched to the air-liquid interface stage for 10 days or more, where media is aspirated,*  
783 *allowing the epidermal differentiation process. During the last step, an extensive degradation and retraction of XPC KO scaffold*  
784 *was observed. The results presented are the mean of three biological replicates (N=10).*

785

786

787



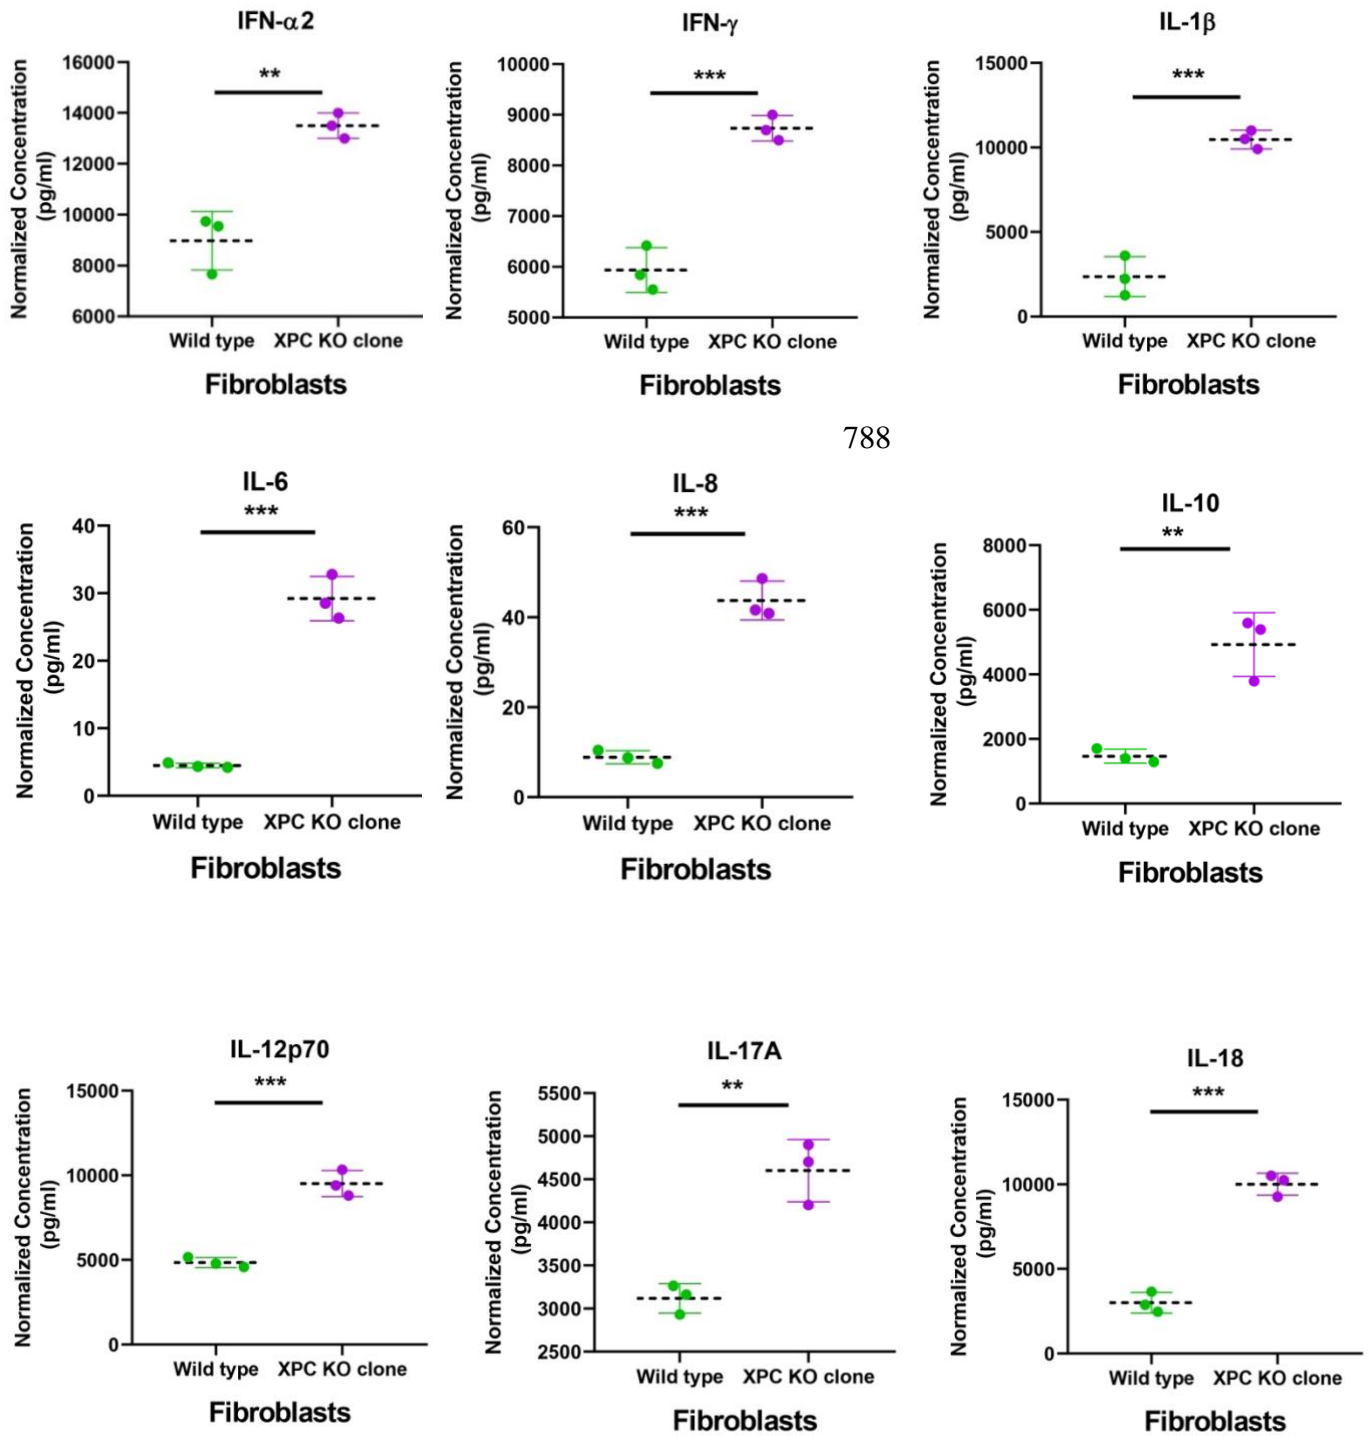

788

789  
790  
791

792  
793  
794  
795  
796  
797  
798  
799

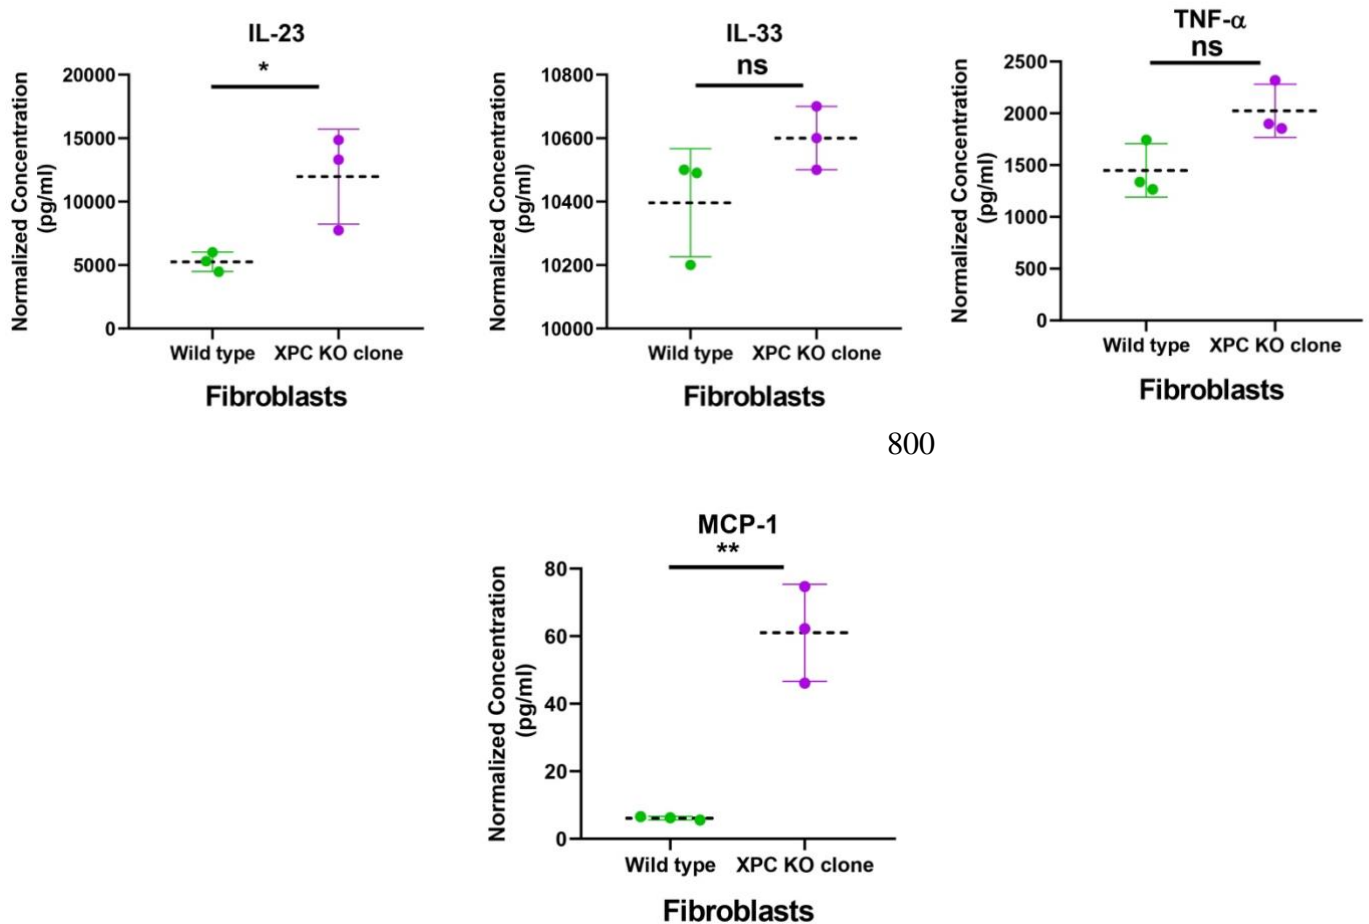

800

801  
802  
803  
804  
805  
806  
807  
808  
809  
810  
811  
812  
813  
814  
815  
816

**Figure 11. XPC KO induces a rise in the inflammatory secretome signature secreted by S1F/TERT-1 fibroblasts.**

817 *XPC KO in S1F/TERT-1 fibroblasts induce an increase in the human inflammatory secretion profile encompassing both chemokines*  
818 *and cytokines. This included a rise in IL-1 $\beta$ , IFN- $\alpha$ 2, IFN- $\gamma$ , TNF, MCP-1 (CCL2), IL-6, IL-8 (CXCL8), IL-10, IL-12p70, IL-17A,*  
819 *IL-18, IL-23, and IL-33. Subsequently, samples were acquired using a FACSCanto™ II cytometer and analyzed utilizing the online*  
820 *QOIGNIT LEGENDplex™ program. The statistical significance was denoted as \*\*p-value<0.01, \*\*\*p-value<0.001, \*\*\*\*p-*  
821 *value<0.0001 (unpaired t-test). The results presented are the mean of three biological replicates (N=3).*  
822

823 Moreover, IL-10 showed an increased concentration of 4,922 pg/ml, marking a 3.3-fold rise  
824 compared to the corresponding wild-type concentration of 1,464 pg/ml. IL-12p70 demonstrated a  
825 significant increase to 9,511 pg/ml, indicating a 2-fold rise in comparison to the wild-type  
826 concentration of 4,845 pg/ml. Similarly, IL-17A exhibited a concentration increase to 4,600 pg/ml,  
827 representing a 1.5-fold elevation compared to the wild-type concentration of 3,118 pg/ml. IL-18  
828 displayed a substantial increase to 10,000 pg/ml, showcasing a notable 3.33-fold rise compared to  
829 the wild-type concentration of 2,999 pg/ml. IL-23 exhibited a significant increase to 11,970 pg/ml,  
830 reflecting a 2.3-fold elevation compared to the 5,262 pg/ml concentration in their wild-type  
831 counterparts. In contrast, IL-33 showed no significant difference in concentration, hovering around  
832 10,500 pg/ml. While TNF- $\alpha$  demonstrated a slight increase in concentration to 1,882 pg/ml, it did  
833 not reach statistical significance, representing a 1.3-fold rise compared to the wild-type  
834 concentration of 1,448 pg/ml. Finally, MCP-1 displayed a substantial increase to 61 pg/ml,  
835 indicating a remarkable 9.95-fold rise compared to the wild-type concentration of 6 pg/ml.  
836

## 837 Discussion

838 Examining the function of a gene or multiple genes in human cells is essential for understanding  
839 the complex mechanisms behind various human diseases. Many research studies have utilized  
840 RNA interference (RNAi) technology to diminish the expression of specific genes<sup>27,28</sup>. However,  
841 this approach, which primarily aims at knockdown, still needs to fully attain a total elimination of  
842 gene/protein expression and may result in unintended off-target effects<sup>29</sup>. Consequently, there is a  
843 pressing need for techniques that enable the comprehensive knockout of a gene in human cells.  
844 Our research work marked for the first time a simple, straightforward, and successful modeling  
845 strategy for the XP-C disease in all three immortalized cell types which form the main core of the  
846 human skin—keratinocytes, fibroblasts, and melanocytes. This was achieved by introducing a  
847 loss-of-function mutation to the *XPC* gene at the exon 3 site through the CRISPR-Cas9 strategy  
848 based on ribonucleoprotein (RNP), utilizing the same single-guide RNA (sgRNA) via NEON  
849 electroporation system. For maximal delivery and editing efficacy, three parameters must be  
850 roughly optimized, and each parameter needs to complement the other. These include delivery  
851 approach, cargo system, and cellular type (proliferation rate, fragility, and size). Based on the  
852 literature, the ribonucleoprotein (RNP) approach coupled with NEON electroporation exerts a  
853 strong editing potential<sup>30</sup>. RNP complex is simple to create, has a transient transfection impact that  
854 doesn't integrate into the host's DNA, limiting the off-target effect, and exerts minimal cytotoxicity  
855 thanks to its small size contrary to that of the plasmid strategy<sup>31</sup>. NEON electroporation is  
856 categorized as a physical delivery approach that can be optimized to select the best parameters  
857 (number of pulses, time, and voltage) suitable for the maximal delivery efficacy to the host cells  
858 of interest, giving it a strong advantage over the other electroporation systems like nucleofector™  
859 II/2b device that lacks the setup parameters option, thus can drastically cause enormous cellular  
860 stress and mortality. For our manipulated human skin cells (keratinocytes, fibroblasts, and  
861 melanocytes), several NEON programs were tested. Finally, 1700v, 10ms, 1pulse was the best,  
862 along with the RNP system, to perturb the *XPC* gene reaching an editing efficacy of around 99%.  
863 This efficacy yield facilitated the selection of the homogenous knockout clones from the three  
864 heterogenous (edited and non-edited) cell types. It's important to note that this editing strategy can  
865 be applied to pursue different research objectives. By adjusting the specific sgRNA of interest,  
866 researchers can use various cell types and target different genes.

867  
868 XP-C stands out as one of the prevalent types of XP<sup>32</sup>. Almost all of these mutations can be in the  
869 form of nonsense, frameshift, and deletion events in XP-C patients<sup>33</sup>. In XP-C patients, there is an  
870 absence of XPC protein and almost a negligible expression of XPC at the mRNA level<sup>33</sup>. Our  
871 knockout results were confirmed for the three cell types at the protein level using western blot  
872 assay, where they showed a complete absence of the XPC protein band compared to their  
873 associated wild-type controls. This result is consistent with the prior study conducted by Chavanne  
874 et al.<sup>34</sup>, which reported the absence of XPC protein in cells obtained from individuals with XP-C.  
875 Furthermore, the significant downregulation of the XPC mRNA expression level was also  
876 confirmed via RT-PCR for the three cell types. Legerski and Peterson<sup>35</sup>, Khan et al.<sup>33</sup>, and Fayyad  
877 et al.<sup>18</sup> reported minimal levels of XPC mRNA in cells derived from XP-C patients. This indicates  
878 that CRISPR-Cas9 mediated edit of *XPC* gene can tend to generate mutant mRNAs that may  
879 harbor premature termination codons (PTCs) that trigger nonsense-mediated mRNA decay (NMD  
880 pathway) as a protective mechanism, preventing the expression of harmful truncated proteins. This  
881 suggestion has been also implemented by several groups that worked on cells from XP-C

882 patients<sup>18,33,34,36</sup>. Using immunofluorescence staining, we confirmed the presence of XPC protein  
883 in the nucleus for the wild-type cells; this is not surprising since this protein is a critical player in  
884 the GG-NER system<sup>37</sup>, and its complete absence following the knockout in the three cell types.  
885 Finally, Sanger sequencing showed that the exon 3 region of the *XPC* gene harbors 2 nucleotides  
886 indel mutation for keratinocytes, 5 nucleotides indel mutation for fibroblasts, and 258 nucleotides  
887 indel mutation for melanocytes (data not shown here). These indel mutations disrupted the open  
888 reading frame by yielding an early stop codon. A two-stage mechanism can account for the  
889 homozygous mutation. Because it is unlikely that the homozygous indel mutation was caused by  
890 two simultaneous deletion events in both alleles, we hypothesized that it was caused by a loss of  
891 one allele or by a sequential process of an initial deletion in one allele caused by non-homologous  
892 end joining (NHEJ) followed by repair of the other allele by the homology-directed repair (HDR)  
893 using the altered allele sequence as a template.

894  
895 Research articles investigating the link between XPC, and skin biology concentrate on primary  
896 XPC-mutated keratinocytes and fibroblasts<sup>17,18</sup>. As previously highlighted, the absence of an  
897 appropriate control in primary XP-C cells hinders the comparison of outcome data, posing a  
898 challenge in exploring the molecular events associated with this disease, especially given the  
899 inherent heterogeneity among individuals and we should be aware that since the GG-NER DNA  
900 repair system is absent in XP-C patients, a higher susceptibility to other unknown genetic  
901 mutations can occur hindering the precise outcomes<sup>7</sup>. Therefore, the utilization of CRISPR-Cas9  
902 would be advantageous, providing a significant benefit by generating a mirrored control and  
903 facilitating precise outcome results that are specifically related to the loss of XPC. Unfortunately,  
904 due to the challenging manipulation of primary XPC-mutated melanocytes within their limited  
905 passage potential, there is currently no available data in the literature that highlights their response  
906 to XPC mutation. Given that Xeroderma Pigmentosum C disease is characterized by abnormalities  
907 in pigmentation in patients, the necessity for a diseased melanocyte model becomes evident to  
908 explore the molecular pigmentation features associated with this disease since the term  
909 Pigmentosum implies abnormalities in pigmentation present in patients<sup>38</sup>.

910  
911 Here, the XPC knockout skin cell types, encompassing keratinocytes, fibroblasts, and  
912 melanocytes, underwent characterization across three levels: UVB photosensitivity, 6-4PPs repair  
913 capacity, and proliferation status. What was of main interest was the distinct behavioral responses,  
914 particularly the variation in photosensitivity intervals, among these three cell types when exposed  
915 to UVB irradiation. In our study on N/TERT-2G keratinocytes, we compared the viability of XPC  
916 KO with their associated wild-type cells under a time (24, 48, and 72 hours) and UVB dose  
917 dependent manner, leading us to confirm their photosensitive nature. Additionally, our analysis of  
918 UVB-induced DNA lesions (6-4PPs) through single-cell quantification using immunofluorescence  
919 showed that XPC KO keratinocytes experienced a disturbance in their GG-NER system compared  
920 to their associated wild-type cells 24 hours after UVB irradiation. This perturbation was evident  
921 as the lesions persisted, indicating impaired DNA repair. Remarkably, our findings align closely  
922 with those of Warrick et al.<sup>17</sup>, who studied three independent XP-C mutated keratinocytes from  
923 patients and characterized this model. This concurrence in results further supports the validity of  
924 our XPC KO keratinocyte model and its resemblance to the real XP-C disease phenotype. Given  
925 that keratinocytes are crucial in the pathology of XP-C disease, being the uppermost cells exposed  
926 to UV radiation and capable of transforming into non-melanoma skin cancers, our CRISPR-Cas9  
927 system-generated model can provide valuable insights into the specific disrupted pathways that



928 are uniquely altered in XPC KO keratinocytes compared to wild-type cells. These insights can  
929 potentially advance our understanding of XP-C disease and may contribute to the development of  
930 novel therapeutic approaches as shown in our recent work by Kobaisi et al.<sup>23</sup> In the case of  
931 S1F/TERT-1 fibroblasts, we observed a very slight/nearly absence but significant difference in  
932 viability between wild-type and XPC KO fibroblasts. Interestingly, both wild-type and XPC KO  
933 fibroblasts exhibited a similar pattern of decreasing viability, in response to increasing UVB  
934 exposure in a time (24, 48, and 72 hours) and dose-dependent manner, highlighting a nearly slight  
935 to absence of photosensitive nature when XPC is lost. Furthermore, our single cell quantification  
936 analysis of UVB-induced DNA lesions (6-4PPs) using immunofluorescence after 24 hours of UVB  
937 irradiation revealed that XPC KO fibroblasts exhibited a perturbation in their GG-NER system  
938 compared to their associated wild-type cells like what was observed in the study by Fayyad et al.  
939 In Fayyad's work, three independent primary XP-C mutated fibroblasts from patients were  
940 characterized, and their responses to UVB dose-dependent photosensitivity were almost identical  
941 to those of the wild-type fibroblasts, showing no significant difference<sup>18</sup>. Our immortalized XPC  
942 KO fibroblast model demonstrated strong coherency with their findings, supporting the validity of  
943 our approach to mimic the real disease phenotype from patients. De Waard et al.<sup>39</sup> also  
944 demonstrated similar findings as Fayyad et al. regarding photosensitivity in their study. They  
945 showed that XP-C mutated fibroblasts exhibited comparable photosensitivity to wild-type  
946 fibroblasts with an accumulation of 6-4PPs damage following 24 hours of UVB irradiation. XPC  
947 KO fibroblasts generation can be of main interest given the fact that these cells are well known to  
948 influence keratinocytes and melanocytes through their secretions and might serve a more realistic  
949 model following coculturing or 3D experimental designs linked to study XP-C disease and follow-  
950 up of skin cancer onset. In our study on melanocytes, we observed the most pronounced  
951 photosensitivity profile in XPC KO melanocytes compared to wild-type cells, demonstrating a  
952 clear response in a time (24, 48, and 72 hours) and dose-dependent manner. Additionally, our  
953 examination of UVB-induced DNA lesions (6-4PPs) through single-cell quantification analysis,  
954 conducted using immunofluorescence after 24 hours of UVB exposure, demonstrated that  
955 melanocytes lacking XPC exhibited a disturbance in their GG-NER system when compared to  
956 their corresponding wild-type cells. It's important to note that the lack of data in the literature on  
957 XP-C mutated melanocytes from patients necessitated us to develop our own protocol for modeling  
958 this disease in melanocytes. XPC KO melanocytes model can be of main interest for future  
959 profiling of the pigmentation machinery to develop photoprotective strategies linked to XP-C  
960 disease and why not to various pigmentary disorders since this domain is still elusive. Indeed, for  
961 the proliferation part, our microscopic observation urged an EDU assay to prove the effect of the  
962 XPC KO on partially halting the proliferation of XPC KO keratinocytes, fibroblasts, and  
963 melanocytes. Here, we show a new possible method for characterization of XPC mutants via  
964 assessing the effect on the proliferation status specifically in the skin biology context. Indeed, some  
965 papers have studied the impact of XPC silencing on the proliferation status of lung cancerous  
966 cells<sup>40,41</sup>. Cui et al. have shown that XPC silencing in non-small-cell lung cancer (NSCLC) cells  
967 has increased their proliferation and migration status<sup>40</sup> while Teng et al. have shown that XPC  
968 downregulation will tend to promote more sensitivity towards cisplatin treatment, implying a  
969 decreased proliferation of adenocarcinoma cells<sup>41</sup>. Due to its multifunctional nature, XPC may  
970 demonstrate diverse effects depending on the organ, requiring a specific emphasis on its  
971 association with proliferation in each compartment individually to understand the overall impact.  
972 In this study, we highlight for the first time that the knockout of XPC disrupts the proliferation of  
973 human skin cells including keratinocytes, fibroblasts, and melanocytes.



974  
975 3D disease modeling offers more realistic environment to study interactions<sup>42</sup>. Constructing a skin  
976 model with immortalized human cells faces its greatest challenge in achieving the various  
977 epidermal layers and by preserving a proper differentiation process. For instance, HaCaT cells  
978 have proven to encounter difficulties in replicating primary human skin cells<sup>43</sup> due to its  
979 chromosomal abnormalities, whereas the N/TERT-2G cell line has successfully exhibited a  
980 substantial similarity to primary human keratinocytes, providing a significant advantage for  
981 unrestricted 3D modeling<sup>44</sup> and demonstrating a normal chromosomal arrangement profile<sup>44</sup>. In a  
982 first attempt using XPC KO skin cells, we aimed to generate 3D reconstructed skin model and  
983 compare it to its referred wild-type skin model. Unfortunately, a huge degradation of the  
984 Extracellular matrix embed in fibrin gel scaffold was observed during the differentiation process  
985 compared to the wild-type which demonstrated a well differentiated skin profile (data not shown  
986 here). Following that, our attention shifted to XPC KO fibroblasts, being the key cells involved in  
987 secretions. Given that Thierry Magnaldo and his team have demonstrated a heightened expression  
988 of matrix metalloproteinase 1 (MMP-1) induced by primary XP-C mutated fibroblasts from  
989 patients<sup>24</sup>, our goal was to have an explanation. Surprisingly, we observed a strong drive in a bunch  
990 inflammatory cytokine (IL-1 $\beta$ , IFN- $\alpha$ 2, IFN- $\gamma$ , TNF- $\alpha$ , MCP-1, IL-6, IL-8, IL-10, IL-12, IL-17A,  
991 IL-18, IL-23, and IL-33) present in the secretome of XPC KO fibroblasts versus their associated  
992 wild-type cells which might explain this aberrant degradation. IL-1 $\beta$  is a proinflammatory cytokine  
993 and has shown to stimulate the production of MMP-1<sup>45,46</sup>. Indeed, Sánchez et al. has also shown  
994 that increased production of both IL-1 $\beta$  and IL-8 was associated with an augmentation in MMPs  
995 including MMP-1<sup>47</sup>. Li et al. has shown that IL-6 which is a proinflammatory cytokine can  
996 stimulate MMP-1<sup>48</sup>. Du et al. have also proved that TNF- $\alpha$  can stimulate MMP-1 through IL-6  
997 which mediates the effect in fibroblasts<sup>26</sup>. Additionally, Miao et al. have shown that IL-12p70  
998 mediate the expression of MMP-1 via stimulating NF- $\kappa$ B activation pathway<sup>49</sup>. Cortez et al. have  
999 also shown that IL-17 induces MMP-1 production in primary human cardiac fibroblasts through  
1000 the activation of p38 MAPK and ERK1/2, leading to the activation of C/EBP-beta, NF- $\kappa$ B, and  
1001 AP-1<sup>50</sup>. Wang et al. also demonstrated that IL-18 enhances the release of MMP-1 in human  
1002 periodontal ligament fibroblasts through the activation of NF- $\kappa$ B signaling<sup>51</sup>. Yamamoto et al. has  
1003 shown that Monocyte chemoattractant protein-1 (MCP-1) amplifies the gene expression and  
1004 production of MMP-1 in human fibroblasts through an autocrine loop involving IL-1 alpha<sup>52</sup>. IFN-  
1005  $\alpha$ 2 and IFN- $\gamma$  are cytokines that are well known to stimulate various inflammatory pathways  
1006 especially JAK/STAT signaling<sup>53</sup> that promotes MMP-1 expression. These cytokines have the  
1007 ability to engage in various combinations of communication and can bind to several receptors  
1008 associated with inflammatory responses. This could lead us to a preliminary understanding of the  
1009 anomalous degradation of the scaffold following the knockout of XPC.

## 1010 Conclusion

1011 XP-C is a rare inherited genetic disorder characterized by hypersensitivity to ultraviolet radiation  
1012 and the accumulation of DNA damage. It results from mutations in the *XPC* gene, leading to a  
1013 deficiency in this protein responsible for recognizing and initiating the repair of UV DNA damage.  
1014 Children affected by XP-C disease are commonly known as "children of the moon" because they  
1015 must avoid sunlight to prevent severe sunburns and reduce the significantly increased risk of  
1016 developing skin cancers, including non-melanoma and melanoma. Unfortunately, there is  
1017 currently no effective cure for XP-C disease, and management primarily focuses on strict sun

1018 protection measures and regular skin screenings to detect cancer early. The journey of a thousand  
1019 miles begins with one step, here, we demonstrate the building block for a reproducible model for  
1020 this disease, which can open future avenues for the loss of XPC in the context of skin biology and  
1021 will permit novel molecular profiling of the mysteries underlying this disease for novel  
1022 therapeutics and can be used as a tracker for skin cancer onset.

1023  
1024

## 1025 **Materials and Methods**

1026

### 1027 **Cell lines**

1028

1029 Human immortalized male epidermal keratinocyte (N/TERT-2G)<sup>54</sup> and human immortalized male  
1030 dermal fibroblast (S1F/TERT-1)<sup>54</sup> cell lines were kindly supplied as a gift from Dr. James  
1031 Rheinwald Laboratory (Harvard Medical School, Boston, USA). Human immortalized male  
1032 melanocyte cell line (Mel-ST) was kindly supplied as a gift from Dr. Robert Weinberg Laboratory  
1033 (Whitehead Institute for Biomedical Research, Cambridge, USA)<sup>55</sup>. Wild type N/TERT-2G cell  
1034 line was cultured using EpiLife medium with 60  $\mu$ M calcium (Gibco™, cat. #MEPI500CA),  
1035 supplemented with human keratinocyte growth supplement (HKGS, Gibco™, cat. #S0015),  
1036 containing Human growth factor I insulin-like recombinant: 0.01  $\mu$ g/ml, Bovine pituitary extract  
1037 (BPE): 0.2% v/v, Bovine transferrin: 5  $\mu$ g/ml, Hydrocortisone: 0.18  $\mu$ g/ml and Human epidermal  
1038 growth factor: 0.2 ng/ml with added CaCl<sub>2</sub> (340  $\mu$ M, Sigma-Aldrich, Saint Louis, USA) and 1%  
1039 penicillin/streptomycin. Wild type S1F/TERT-1 cell line was cultured using M199 (Gibco™, cat.  
1040 #11150-059) and M106 (Gibco™, cat. #M-106-500) +15% iron-supplemented newborn bovine  
1041 calf serum (Hyclone/Thermo Scientific, cat. #SH3007203) +10 ng/ml EGF +0.4  $\mu$ g/ml  
1042 hydrocortisone with added 1% penicillin/streptomycin. Wild type Mel-ST cell line was cultured  
1043 in DMEM (Gibco™, cat. #12430054) supplemented 10% FBS and 1% penicillin/streptomycin.  
1044 All cell lines were maintained at 37° C in a 5% CO<sub>2</sub> incubator. When cells attained confluence,  
1045 they were passaged 1:4–1:10, depending on the cells utilized. Cells were washed with 8 mL  
1046 phosphate buffered saline (PBS, pH 7.4, Gibco™) before being dissociated from the culture flask  
1047 (T75 cm<sup>2</sup>) with 3 mL 0.05% trypsin/EDTA (Gibco™) for 5-10 minutes at 37°C depending on the  
1048 cell line. Trypsinization was blocked by the addition of 8 mL of complete culture medium.  
1049 Furthermore, cells were centrifuged at 100× g speed for 5 minutes and the supernatant was  
1050 discarded.

### 1051 **NEON™ ELECTROPORATION SYSTEM**

1052 Wild-type N/TERT-2G, S1F/TERT-1 and Mel-ST cell lines were electroporated with  
1053 ribonucleoprotein complex via Neon™ Electroporation System (ThermoFisher Scientific,  
1054 Massachusetts, USA). To maximize the genome-editing efficacy, 1.5  $\mu$ g of TrueCut Cas9 protein  
1055 (ThermoFisher Scientific, Massachusetts, USA) was added to 5  $\mu$ l of resuspension buffer (R  
1056 buffer), followed by the addition of 300 ng of predesigned sgRNA targeting exon 3 region of the  
1057 XPC gene with a crRNA sequence (5'AGGCACACCATCTGAAGAGA3') (ThermoFisher  
1058 Scientific, Massachusetts, USA). The sgRNA and Cas9 mixture was incubated for 10 minutes at

1059 room temperature to assemble and form the ribonucleoprotein complex. Meanwhile, 100,000 cells  
1060 were also suspended in 5  $\mu$ l of R buffer. Then cell suspension was added to the RNP complex mix.  
1061 10  $\mu$ l volume of the mix was then electroporated at 1700v, 10ms, 1pulse, transferred into their pre-  
1062 warmed media, and incubated for 48 hours in 5% CO<sub>2</sub> to expand for the post-genome editing  
1063 analysis.

1064

## 1065 Single-cell limiting dilution

1066 For the selection of single clones, the N/TERT-2G heterogeneous cell population was separated  
1067 using the standard limiting serial dilution method in a 96-well plate (Greiner Bio-One, France),  
1068 S1F/TERT-1 and Mel-ST heterogeneous cell populations were sorted using BD FACSMelody™  
1069 Cell Sorter. Single-cell clones were marked, tracked and further kept cultured for 2 weeks.  
1070 Afterwards, single-cell populations were expanded in a 6-well plate (Greiner Bio-One, France) for  
1071 further post-genome editing analysis.

1072

## 1073 RT-qPCR

1074 The total RNA content was extracted from wild-type and XPC KO keratinocytes, fibroblasts and  
1075 melanocytes using RNeasy plus mini kit (#Cat. 74134, Qiagen, France). Quantification of RNA  
1076 was done using Nanodrop 1000. Reverse transcription to cDNA was achieved by using RNA (1 $\mu$ g)  
1077 and the Superscript vilo cDNA synthesis kit (#Cat. 11754050, Invitrogen, Massachusetts, USA).  
1078 25 ng of XPC and GAPDH (Qiagen, France) cDNAs were then used to launch the qPCR reaction  
1079 using gene-specific primers along with the Platinum SYBR green qPCR SuperMix-UDG  
1080 (#Cat.11733038, Invitrogen, Massachusetts, USA). Using BioRad CFX96™ Real-time System  
1081 (C1000 Touch™ Thermal Cycler), samples were launched in triplicates (N=3). To unravel the  
1082 specificity of the primers utilized, Melt curve analysis was conducted to ensure that a single melt-  
1083 curve peak was present. Glyceraldehyde-3- phosphate dehydrogenase (GAPDH) housekeeping  
1084 gene was used to normalize the expression level of the target gene. Fold change expression levels  
1085 were calculated based on the  $2^{-\Delta\Delta CT}$  Livak method. Samples were launched in triplicates (N=3).  
1086

## 1087 Immunoblotting

1088 Total proteins from wild-type and XPC KO keratinocytes, fibroblasts and melanocytes were  
1089 extracted by adding 100  $\mu$ L of lysis buffer RIPA (Sigma Aldrich, Missouri, USA) supplemented  
1090 with a phosphatase and protease inhibitor cocktail. A 30-minute incubation of the samples on ice  
1091 followed this. The sample mixture was transferred to 1.5 mL Eppendorf tubes and centrifuged for  
1092 15 minutes at 16000rpm at 4°C. Total protein dosage was further carried out using a BCA protein  
1093 quantification kit (Life Technologies, California, USA). Western blotting protocol was performed  
1094 as previously described. Equal protein amounts were resolved by SDS-PAGE (Life Technologies,  
1095 California, USA) and transferred to a nitrocellulose membrane (IBlot gel transfer, Life  
1096 Technologies, California, USA). The nitrocellulose membrane was blocked with 5% lyophilized  
1097 milk or bovine serum album (BSA), followed by the addition of primary XPC antibody (1/500)  
1098 incubated overnight at 4°C. Afterward, incubation with mouse HRP antibody (1/5000 diluted  
1099 secondary antibody) was done for 1 hour at room temperature and following the addition of the

1100 western lightening ECL Pro ECL (Perkin Elmer), images were then directly recorded using Biorad  
1101 Molecular Imager® Chemi Doc™ XRS. Results were analyzed using Image Lab™ software.  
1102 Glyceraldehyde-3- phosphate dehydrogenase (GAPDH) housekeeping gene was utilized to  
1103 normalize the expression level of the target gene. Samples were launched in triplicates (N=3).

1104

## 1105 Sequencing and off-target analysis

1106 For post-genome editing analysis, wild-type and heterogeneous populations of N/TERT-2G cells  
1107 were harvested, as mentioned above. DNA was extracted via QIAamp DNA mini kit (Qiagen,  
1108 France) based on the manufacturer's instructions. Using PCR primers, forward primer sequence  
1109 (5'CCATTGACAGTCACCAGAGG3') and reverse primer sequence  
1110 (5'AACATAGCTGTGCCTGGACA3'), the genomic area of XPC's exon three was amplified to  
1111 yield an amplicon of 612 bases in size. Amplified amplicons were desalted and sequenced at  
1112 Microsynth, France. Chromatograms were generated by the Inference of the CRISPR Edits (ICE)  
1113 tool designed by Synthego to assess the genome editing efficacy based on the knockout (KO) score  
1114 in a heterogeneous population versus wild-type N/TERT-2G keratinocytes. Wild-type and XPC  
1115 KO N/TERT-2G, S1F/TERT-1 and Mel-ST cell lines were prepared similarly as mentioned above  
1116 for final KO clones sequencing. To predict the off targets of the predesigned sgRNA utilized,  
1117 CRISPOR software was utilized.

1118

## 1119 UVB dose response

1120 The photosensitivity of XPC KO cells was assessed and compared to wild-type cells based on the  
1121 increased doses of ultraviolet B (UVB) treatment. Both wild type and XPC KO cells from each  
1122 cell line and type were seeded in 6 well plates and kept until they reached 80 percent confluence.  
1123 Before irradiation, they were rinsed with PBS and then exposed to escalating UVB doses. The  
1124 viability of the cells was recorded 24-, 48-, and 72-hours post UVB irradiation using trypan blue  
1125 assay (Thermofisher Scientific, Massachusetts, USA) based on the manufacturer's instructions.  
1126 Normalization of the data was performed by calculating at each dose the viability percentage and  
1127 comparing it to control non-irradiated cells (dose 0 J/cm<sup>2</sup>) set as 100% viability. Samples were  
1128 launched in triplicates (N=3).

1129

## 1130 Immunofluorescence and associated microscopy

1131 To test the repair capacity, both wild type and XPC KO cells from each cell line and type were  
1132 seeded to reach 80% confluence. Afterwards, these cells were subjected to UVB irradiation.  
1133 Following UVB irradiation at time 0h and after 24 hours, cells were further stained based on the  
1134 protocol, which comprises the fixation of the cells using 4% paraformaldehyde and 0.2% of Triton  
1135 X-100 to permeabilize the cells. 2M HCL was then utilized to fully denature the DNA double  
1136 helix, enhancing the access of the antibody targeting DNA damage caused by UVB irradiation.  
1137 After the saturation process, cells were incubated overnight with 1/200 primary 6-4PP antibody  
1138 (Cosmo Bio, California, USA). Secondary mouse antibody 1/500 FITC (Invitrogen, California,  
1139 USA) was then added the next day after several PBS washes to remove the unbound 6-4PP primary



1140 antibody. Another PBS wash removed the unbound secondary antibody to finally counterstain the  
1141 DNA with Hoechst (Sigma Aldrich, Missouri, USA). With a 10X magnification, Image acquisition  
1142 was done and then quantified using Cell-insight NXT. Samples were launched in triplicates (N=3).  
1143 For XPC or vimentin staining, the same steps were utilized as mentioned above, excluding the step  
1144 of 2M HCL incubation and by using 1/200 primary antibody targeting XPC (mouse, Santa Cruz,  
1145 sc-74410 or vimentin (rabbit, Abcam, ab92547).

1146

## 1147 Cell proliferation assay

1148 To decipher the impact of *XPC* gene KO on the proliferation status of N/TERT-2G, S1F/TERT-1,  
1149 and Mel-ST cell lines, an EDU assay was carried out. The utilization of the nucleoside analog  
1150 EDU within cells has the potential to assess cellular health profile and genotoxicity. A copper-  
1151 catalyzed covalent reaction between an azide and an alkyne, known as click chemistry, can be  
1152 employed to quantify the integration of the nucleoside analog EDU and provide further insight  
1153 into its incorporation. To do that, wild-type and XPC KO of each cell type were seeded in 6 well  
1154 plates to reach 50% of confluence. Afterwards, EDU was diluted and added to the cell media for  
1155 5 hours. Subsequently, the cells were detached using trypsin, collected, and subjected to staining  
1156 as per the guidelines provided by the manufacturer (Thermo Fisher Scientific, Massachusetts,  
1157 USA). The analysis was carried out utilizing flow cytometry equipment (FACScan, BD LSRII  
1158 flow cytometer, BD Biosciences). The post-analysis was done using flowing software (Turku  
1159 Bioimaging, Finland). Samples were launched in triplicates (N=3).

1160

## 1161 3D Reconstructed Skin Model

1162 A hydrogel scaffold was prepared to encapsulate cells to form a convenient matrix for all  
1163 experiments. This hydrogel comprises a solution of 2.5% fibrinogen (w/v) (cat #F8630, Sigma  
1164 Aldrich, France) with aprotinin (cat #A6279, Sigma Aldrich, France) and 2.5 mM of CaCl<sub>2</sub> (cat  
1165 #C8106, Sigma Aldrich, France). Wild-type and XPC KO S1F/TERT-1 Fibroblasts were  
1166 suspended in 1 ml of fibrinogen to construct a human dermal equivalent. Afterwards, for the  
1167 polymerization process, thrombin (cat #T4648, Sigma Aldrich, France) was added at a  
1168 concentration of 1 U/ml. Then 360 microliters of this cell-laden hydrogel solution were gently and  
1169 immediately added into each of the culture chambers (cat 3460, Transwell Corning, USA), which  
1170 are embedded in a 12-well plate and were kept to solidify in a cell culture incubator at 37°C with  
1171 5% CO<sub>2</sub>. After 30 minutes of incubation, 2 ml of DMEM media (ref 31966047, Gibco, Life  
1172 Technologies, USA) containing 10% of fetal bovine serum (Life Technologies, USA) and 1%  
1173 penicillin/streptomycin (P/S) (Life Technologies, USA) were added then deposited at the bottom  
1174 part of each well, and 500 microliters were added to the top of this solidified cell hydrogel matrix.  
1175 The human dermal equivalent was kept in culture for 15 days. Every two days, the media was  
1176 changed, 10 ng/ml of epidermal growth factor (EGF) and 80 µg/ml of vitamin C/ascorbic acid (cat  
1177 A8660-5g, Sigma Aldrich, France) were supplemented to permit the maturation of the construct.  
1178 Following 15 days, at passage 7, wild type and XPC KO N/TERT-2G keratinocytes and Mel-ST  
1179 melanocytes were harvested. A mix of 1:40 ratio between keratinocyte and melanocyte cells was  
1180 seeded onto the top of the dermal equivalent. The skin organoids were kept immersed for 9 days  
1181 in the green-adapted medium. Every two days, the media was changed. On day 24, each condition



1182 was raised on the air-liquid interface. To do so, the inserts were transferred to 12 well plates to  
1183 secure them, and at the same time, 4 ml of DMEM media (ref 31966047, Gibco, Life Technologies,  
1184 USA) with 80 µg/ml of vitamin C/ascorbic acid (cat A8660-5g, Sigma Aldrich, France), 8 mg/ml  
1185 of bovine serum albumin (cat A2153-50G, Sigma Aldrich, France) and 1% of  
1186 penicillin/streptomycin (P/S) (Life Technologies, USA) were added to each condition in deep well  
1187 plates so that lower surface of the insert will become in contact with the media and the upper part  
1188 was deprived of media so that keratinocytes and melanocytes will differentiate. The organoids  
1189 were kept in culture for 14 days, and the media was changed every 2 days. Samples were done in  
1190 triplicates (N=10).

1191

## 1192 Cytokine Assay

1193 The LEGENDplex™ Human Inflammation Panel 1 kit (BioLegend, San Diego, USA) was utilized  
1194 to measure cytokines and chemokines, which included IL-1β, IFN-α2, IFN-γ, TNF, MCP-1  
1195 (CCL2), IL-6, IL-8 (CXCL8), IL-10, IL-12p70, IL-17A, IL-18, IL-23, and IL-33. The  
1196 measurements were carried out in accordance with the manufacturer's instructions. Subsequently,  
1197 samples were acquired using a FACSCanto™ II cytometer (BD Biosciences, Franklin Lakes,  
1198 USA) and analyzed utilizing the online QOGNIT LEGENDplex™ program.

## 1199 Statistical Analysis

1200 Single cell analysis were carried out by R software. GraphPad Prism v.8 was used for statistical  
1201 analysis, data normalization and quantification of normality to allow the downstream selection of  
1202 the respective statistical test (parametric or non-parametric) for each particular set of experiments.

## 1203 Acknowledgment

1204

1205 AN is supported by a fund from the doctorate school (EDISCE) at University Grenoble Alpes.  
1206 WR's contribution was funded by ANR grant PG2HEAL (ANR-18-CE17-0017) and supported by  
1207 the French National Research Agency in the framework of the "Investissements d'avenir" program  
1208 (ANR-15-IDEX-02).

## 1209 Authors' Contribution

1210

1211 AN performed all the experiments and wrote the manuscript. ES and WR supervised the project.  
1212 FK revised the manuscript. AH aided in cell culture. HR and JR aided in secretome profiling  
1213 analysis. JS aided in the keratinocytes CRISPR protocol. All authors edited, read, and approved  
1214 the manuscript.

## 1215 Conflict of interest

1216

1217 The authors declare no conflict of interest.

1218

## 1219 Reference List

- 1220
- 1221 1. Gilaberte, Y., Prieto-Torres, L., Pastushenko, I. & Juaranz, Á. Chapter 1 - Anatomy and
- 1222 Function of the Skin. in *Nanoscience in Dermatology* (eds. Hamblin, M. R., Avci, P. & Prow,
- 1223 T. W.) 1–14 (Academic Press, Boston, 2016). doi:10.1016/B978-0-12-802926-8.00001-X.
- 1224 2. Griffiths, H. R., Mistry, P., Herbert, K. E. & Lunec, J. Molecular and cellular effects of
- 1225 ultraviolet light-induced genotoxicity. *Crit. Rev. Clin. Lab. Sci.* **35**, 189–237 (1998).
- 1226 3. Douki, T. The variety of UV-induced pyrimidine dimeric photoproducts in DNA as shown by
- 1227 chromatographic quantification methods. *Photochem. Photobiol. Sci. Off. J. Eur. Photochem.*
- 1228 *Assoc. Eur. Soc. Photobiol.* **12**, 1286–1302 (2013).
- 1229 4. Hung, K.-F., Sidorova, J. M., Nghiem, P. & Kawasumi, M. The 6-4 photoproduct is the
- 1230 trigger of UV-induced replication blockage and ATR activation. *Proc. Natl. Acad. Sci.* **117**,
- 1231 12806–12816 (2020).
- 1232 5. Sakamoto, A. *et al.* Immunoexpression of ultraviolet photoproducts and p53 mutation analysis
- 1233 in atypical fibroxanthoma and superficial malignant fibrous histiocytoma. *Mod. Pathol. Off. J.*
- 1234 *U. S. Can. Acad. Pathol. Inc* **14**, 581–588 (2001).
- 1235 6. Zastrow, L. *et al.* The missing link--light-induced (280-1,600 nm) free radical formation in
- 1236 human skin. *Skin Pharmacol. Physiol.* **22**, 31–44 (2009).
- 1237 7. Nasrallah, A. *et al.* Xeroderma Pigmentosum C: A Valuable Tool to Decipher the Signaling
- 1238 Pathways in Skin Cancers. *Oxid. Med. Cell. Longev.* **2021**, 6689403 (2021).
- 1239 8. Daya-Grosjean, L. Xeroderma pigmentosum and skin cancer. *Adv. Exp. Med. Biol.* **637**, 19–27
- 1240 (2008).

- 1241 9. Nikolaev, S., Yurchenko, A. A. & Sarasin, A. Increased risk of internal tumors in DNA repair-  
1242 deficient xeroderma pigmentosum patients: analysis of four international cohorts. *Orphanet J.*  
1243 *Rare Dis.* **17**, 104 (2022).
- 1244 10. Maillard, O., Solyom, S. & Naegeli, H. An Aromatic Sensor with Aversion to Damaged  
1245 Strands Confers Versatility to DNA Repair. *PLOS Biol.* **5**, e79 (2007).
- 1246 11. Black, J. O. Xeroderma Pigmentosum. *Head Neck Pathol.* **10**, 139–144 (2016).
- 1247 12. Tamura, D., DiGiovanna, J. J., Khan, S. G. & Kraemer, K. H. Living with xeroderma  
1248 pigmentosum: comprehensive photoprotection for highly photosensitive patients.  
1249 *Photodermatol. Photoimmunol. Photomed.* **30**, 146–152 (2014).
- 1250 13. Shimizu, Y., Iwai, S., Hanaoka, F. & Sugawara, K. Xeroderma pigmentosum group C  
1251 protein interacts physically and functionally with thymine DNA glycosylase. *EMBO J.* **22**,  
1252 164–173 (2003).
- 1253 14. Rezvani, H. R. *et al.* XPC silencing in normal human keratinocytes triggers metabolic  
1254 alterations that drive the formation of squamous cell carcinomas. *J. Clin. Invest.* **121**, 195–211  
1255 (2011).
- 1256 15. Liu, K., Sun, Z., Yang, C., Lo, L. J. & Chen, J. Loss-of-Function of xpc Sensitizes  
1257 Zebrafish to Ultraviolet Irradiation. *Fishes* **8**, 191 (2023).
- 1258 16. Bernerd, F. *et al.* Clues to epidermal cancer proneness revealed by reconstruction of  
1259 DNA repair-deficient xeroderma pigmentosum skin in vitro. *Proc. Natl. Acad. Sci.* **98**, 7817–  
1260 7822 (2001).
- 1261 17. Warrick, E. *et al.* Preclinical corrective gene transfer in xeroderma pigmentosum human  
1262 skin stem cells. *Mol. Ther. J. Am. Soc. Gene Ther.* **20**, 798–807 (2012).

- 1263 18. Fayyad, N. *et al.* Xeroderma Pigmentosum C (XPC) Mutations in Primary Fibroblasts  
1264 Impair Base Excision Repair Pathway and Increase Oxidative DNA Damage. *Front. Genet.*  
1265 **11**, 561687 (2020).
- 1266 19. Gerber, P. A. *et al.* The top skin-associated genes: a comparative analysis of human and  
1267 mouse skin transcriptomes. *Biol. Chem.* **395**, 577–591 (2014).
- 1268 20. Jinek, M. *et al.* A Programmable Dual-RNA–Guided DNA Endonuclease in Adaptive  
1269 Bacterial Immunity. *Science* **337**, 816–821 (2012).
- 1270 21. Gomes, R. N., Manuel, F. & Nascimento, D. S. The bright side of fibroblasts: molecular  
1271 signature and regenerative cues in major organs. *Npj Regen. Med.* **6**, 1–12 (2021).
- 1272 22. Gehl, J. Electroporation: theory and methods, perspectives for drug delivery, gene  
1273 therapy and research. *Acta Physiol. Scand.* **177**, 437–447 (2003).
- 1274 23. Kobaisi, F. *et al.* Synthetic rescue of XPC phenotype via PIK3C3 downregulation.  
1275 2023.08.08.552431 Preprint at <https://doi.org/10.1101/2023.08.08.552431> (2023).
- 1276 24. Fréchet, M. *et al.* Overexpression of matrix metalloproteinase 1 in dermal fibroblasts  
1277 from DNA repair-deficient/cancer-prone xeroderma pigmentosum group C patients.  
1278 *Oncogene* **27**, 5223–5232 (2008).
- 1279 25. O’Boskey, F. J. & Panagakos, F. S. Cytokines stimulate matrix metalloproteinase  
1280 production by human pulp cells during long-term culture. *J. Endod.* **24**, 7–10 (1998).
- 1281 26. Distler, J. H. W. *et al.* The induction of matrix metalloproteinase and cytokine expression  
1282 in synovial fibroblasts stimulated with immune cell microparticles. *Proc. Natl. Acad. Sci.* **102**,  
1283 2892–2897 (2005).



- 1284 27. Bantounas, I., Phylactou, L. A. & Uney, J. B. RNA interference and the use of small  
1285 interfering RNA to study gene function in mammalian systems. *J. Mol. Endocrinol.* **33**, 545–  
1286 557 (2004).
- 1287 28. Garcia-Murillas, I. *et al.* An siRNA screen identifies the GNAS locus as a driver in 20q  
1288 amplified breast cancer. *Oncogene* **33**, 2478–2486 (2014).
- 1289 29. Gavrillov, K. & Saltzman, W. M. Therapeutic siRNA: Principles, Challenges, and  
1290 Strategies. *Yale J. Biol. Med.* **85**, 187–200 (2012).
- 1291 30. Tyumentseva, M. A., Tyumentsev, A. I. & Akimkin, V. G. Protocol for assessment of the  
1292 efficiency of CRISPR/Cas RNP delivery to different types of target cells. *PLoS ONE* **16**,  
1293 e0259812 (2021).
- 1294 31. Nasrallah, A., Sulpice, E., Kobaisi, F., Gidrol, X. & Rachidi, W. CRISPR-Cas9  
1295 Technology for the Creation of Biological Avatars Capable of Modeling and Treating  
1296 Pathologies: From Discovery to the Latest Improvements. *Cells* **11**, 3615 (2022).
- 1297 32. Nucleotide Excision Repair Syndromes: Xeroderma Pigmentosum, Cockayne Syndrome,  
1298 and Trichothiodystrophy\* | The Online Metabolic and Molecular Bases of Inherited Disease |  
1299 OMMBID | McGraw Hill Medical.  
1300 <https://ommbid.mhmedical.com/content.aspx?bookId=2709&sectionId=225074157>.
- 1301 33. Khan, S. G. *et al.* Reduced XPC DNA repair gene mRNA levels in clinically normal  
1302 parents of xeroderma pigmentosum patients. *Carcinogenesis* **27**, 84–94 (2006).
- 1303 34. Chavanne, F. *et al.* Mutations in the XPC gene in families with xeroderma pigmentosum  
1304 and consequences at the cell, protein, and transcript levels. *Cancer Res.* **60**, 1974–1982  
1305 (2000).

- 1306 35. Legerski, R. & Peterson, C. Expression cloning of a human DNA repair gene involved in  
1307 xeroderma pigmentosum group C. *Nature* **360**, 610 (1992).
- 1308 36. Senhaji, M. A. *et al.* c.1643\_1644delTG XPC mutation is more frequent in Moroccan  
1309 patients with xeroderma pigmentosum. *Arch. Dermatol. Res.* **305**, 53–57 (2013).
- 1310 37. Petrusseva, I. O., Evdokimov, A. N. & Lavrik, O. I. Molecular Mechanism of Global  
1311 Genome Nucleotide Excision Repair. *Acta Naturae* **6**, 23–34 (2014).
- 1312 38. Kasraian, Z. *et al.* Pigmentation abnormalities in nucleotide excision repair disorders:  
1313 Evidence and hypotheses. *Pigment Cell Melanoma Res.* **32**, 25–40 (2019).
- 1314 39. de Waard, H. *et al.* Cell-type-specific consequences of nucleotide excision repair  
1315 deficiencies: Embryonic stem cells versus fibroblasts. *DNA Repair* **7**, 1659–1669 (2008).
- 1316 40. Teng, X. *et al.* XPC inhibition rescues cisplatin resistance via the Akt/mTOR signaling  
1317 pathway in A549/DDP lung adenocarcinoma cells. *Oncol. Rep.* **41**, 1875–1882 (2019).
- 1318 41. Cui, T. *et al.* XPC inhibits NSCLC cell proliferation and migration by enhancing E-  
1319 Cadherin expression. *Oncotarget* **6**, 10060–10072 (2015).
- 1320 42. Fontoura, J. C. *et al.* Comparison of 2D and 3D cell culture models for cell growth, gene  
1321 expression and drug resistance. *Mater. Sci. Eng. C* **107**, 110264 (2020).
- 1322 43. Boelsma, E., Verhoeven, M. C. & Ponc, M. Reconstruction of a human skin equivalent  
1323 using a spontaneously transformed keratinocyte cell line (HaCaT). *J. Invest. Dermatol.* **112**,  
1324 489–498 (1999).
- 1325 44. Smits, J. P. H. *et al.* Immortalized N/TERT keratinocytes as an alternative cell source in  
1326 3D human epidermal models. *Sci. Rep.* **7**, 11838 (2017).

- 1327 45. Chen, M.-S. *et al.* IL-1 $\beta$ -Induced Matrix Metalloprotease-1 Promotes Mesenchymal Stem  
1328 Cell Migration via PAR1 and G-Protein-Coupled Signaling Pathway. *Stem Cells Int.* **2018**,  
1329 3524759 (2018).
- 1330 46. Lambert, C. A., Lapiere, C. M. & Nusgens, B. V. An interleukin-1 loop is induced in  
1331 human skin fibroblasts upon stress relaxation in a three-dimensional collagen gel but is not  
1332 involved in the up-regulation of matrix metalloproteinase 1. *J. Biol. Chem.* **273**, 23143–23149  
1333 (1998).
- 1334 47. Espinoza-Sánchez, N. A., Chimal-Ramírez, G. K., Mantilla, A. & Fuentes-Pananá, E. M.  
1335 IL-1 $\beta$ , IL-8, and Matrix Metalloproteinases-1, -2, and -10 Are Enriched upon Monocyte–  
1336 Breast Cancer Cell Cocultivation in a Matrigel-Based Three-Dimensional System. *Front.*  
1337 *Immunol.* **8**, 205 (2017).
- 1338 48. Li, Y., Samuvel, D. J., Sundararaj, K. P., Lopes-Virella, M. F. & Huang, Y. IL-6 and  
1339 High Glucose Synergistically Upregulate MMP-1 Expression by U937 Mononuclear  
1340 Phagocytes via ERK1/2 and JNK Pathways and c-Jun. *J. Cell. Biochem.* **110**, 248–259 (2010).
- 1341 49. Miao, L., Zhan, S. & Liu, J. Interleukin-12-mediated expression of matrix  
1342 metalloproteinases in human periodontal ligament fibroblasts involves in NF- $\kappa$ B activation.  
1343 *Biosci. Rep.* **37**, BSR20170973 (2017).
- 1344 50. Cortez, D. M. *et al.* IL-17 stimulates MMP-1 expression in primary human cardiac  
1345 fibroblasts via p38 MAPK- and ERK1/2-dependent C/EBP-beta, NF-kappaB, and AP-1  
1346 activation. *Am. J. Physiol. Heart Circ. Physiol.* **293**, H3356-3365 (2007).
- 1347 51. Wang, F., Guan, M., Wei, L. & Yan, H. IL-18 promotes the secretion of matrix  
1348 metalloproteinases in human periodontal ligament fibroblasts by activating NF- $\kappa$ B signaling.  
1349 *Mol. Med. Rep.* **19**, 703–710 (2019).

- 1350 52. Yamamoto, T., Eckes, B., Mauch, C., Hartmann, K. & Krieg, T. Monocyte  
1351 chemoattractant protein-1 enhances gene expression and synthesis of matrix  
1352 metalloproteinase-1 in human fibroblasts by an autocrine IL-1 alpha loop. *J. Immunol. Baltim. Md 1950* **164**, 6174–6179 (2000).
- 1354 53. Nan, Y., Wu, C. & Zhang, Y.-J. Interplay between Janus Kinase/Signal Transducer and  
1355 Activator of Transcription Signaling Activated by Type I Interferons and Viral Antagonism.  
1356 *Front. Immunol.* **8**, 1758 (2017).
- 1357 54. Human keratinocytes that express hTERT and also bypass a p16(INK4a)-enforced  
1358 mechanism that limits life span become immortal yet retain normal growth and differentiation  
1359 characteristics - PubMed. <https://pubmed.ncbi.nlm.nih.gov/10648628/>.
- 1360 55. Gupta, P. B. *et al.* The melanocyte differentiation program predisposes to metastasis  
1361 following neoplastic transformation. *Nat. Genet.* **37**, 1047–1054 (2005).
- 1362
